1 **Global genetic diversity of *Aedes vexans***

2

3 **North America Insect Invades the World: the Case of the Flood Mosquito, *Aedes vexans***  
4 **(Diptera: Culicidae), from Mitochondrial DNA**

5

6 José Heriberto Vargas-Espinosa<sup>1</sup>, Oscar Alexander Aguirre-Obando<sup>1,\*</sup>

7

8 <sup>1</sup>Escuela de investigaciones en Biomatemática, Universidad del Quindío. Carrera 15, Calle 12  
9 Norte. Armenia, Quindío, Colombia

10

11 \*Corresponding author: [oaobando@gmail.com](mailto:oaobando@gmail.com)

12

13 <sup>1</sup>These authors contributed equally to this work.

## 14 **Abstract**

15 The flood mosquito, *Aedes vexans* (Diptera: Culicidae), native of Canada, and currently  
16 present in all continents, has a vector competence for 30 arboviruses, being responsible for  
17 transmitting diseases, like West Nile fever, Rift Valley fever, Saint Louis Encephalitis and  
18 Eastern Equine Encephalitis. Hence, knowing the structure and gene flow of *A. vexans* is  
19 important to develop adequate vector control strategies for this species. For this, from partial  
20 sequences of the mitochondrial COI gene available in Bold and GenBank, it was possible to  
21 determine the Haplotypic (*Hd*) and nucleotide ( $\pi$ ) gene diversity, genetic structuring and gene  
22 flow at global, continental, and country levels. In total, 1184 sequences were recovered,  
23 distributed between America (88.60%), Europe (7.35%), Asia (3.89%), and Africa (0.17%).  
24 From these, 395 haplotypes (H) were detected without presence of pseudogenes (NUMTs),  
25 with H1 being the most frequent (24.58%) and between H12 - H395 the least frequent varying  
26 between 0.93% (H12) and 0.08% (H395). Phylogenetically, the haplotypes were grouped into  
27 six clades. Clade I grouped haplotypes from countries in America and Europe, while clades II  
28 and III presented haplotypes exclusively from Asia and Europe; clade IV grouped only one  
29 haplotype from Africa and the last ultimo clade V grouped haplotypes from America and  
30 Africa. The global *Hd* and  $\pi$  was 0.92 and 0.01, respectively. In addition, evidence was  
31 obtained of genetic structuring among continents (7.07%), countries (1.62%), and within  
32 countries (91.30%;  $F_{ST} = 0.08$ ,  $p < 0.05$ ) and no isolation by distance was detected ( $r = 0.003$ ,  
33  $p > 0.05$ ). These results suggest that the mosquito populations that invaded other continents  
34 originate directly from the American continent, where possibly transcontinental commercial  
35 routes favored their long-distance dispersion.

36 **Key words:** Cytochrome oxidase subunit I, genetic diversity, gene flow, genetic structuring,  
37 haplotypes, mitochondrial DNA, pseudogenes, vector competence, vector control.



## 39 **Introduction**

40 The flood mosquito, *Aedes vexans* (Meigen, 1830), is present in subtropical regions of all  
41 continents, except for the Antarctic [1,2,3]. In nature this species manages to travel up to 17  
42 km [4]; however, its global invasion was favored through passive transport mediated by  
43 human activities [5]. Like other mosquitos of medical and veterinary importance [6], *A.*  
44 *vexans* lays its eggs in moist sites with flood probability to guarantee their offspring [7] and  
45 these can resist drying out and survive up to three years when kept moist [8]. In general, *A.*  
46 *vexans* females and males feed on nectar, but to mature their ovaries and reproduce, the  
47 females feed principally on mammals, like deer, horses, cattle and pigs [9,10,11]. Normally,  
48 this species is found in rural zones, but when it inhabits suburban and urban zones, it prefers  
49 humans as principal feeding source [12,13].

50 Morphological and molecular evidence suggest the existence of three subspecies of *A.*  
51 *vexans* throughout the world: *Aedes vexans vexans* Meigen in eastern Asia and Oceania,  
52 *Aedes vexans arabiensis* Patton in Africa and Europe, and *Aedes vexans nipponii* Theobald in  
53 southeast Asia [1,14,15,16,17]. The flood mosquito has vector competence for 30 arbovirus  
54 (Elizondo-Quiroga *et al.* 2018) and is involved in the transmission of important diseases, like  
55 the West Nile fever, Rift Valley fever, Saint Louis encephalitis and Eastern Equine  
56 encephalitis, as well as filarial nematodes [18,19].

57 Given the epidemiological and sanitary importance of *A. vexans*, understanding the  
58 structuring patterns and gene flow of this species' populations is important to develop more-  
59 adequate vector control programs [20], as well as understand the transmission of vectors  
60 among the human population, given its influence on pathogen transfer and dissemination of  
61 characteristics, like vector competence and resistance to insecticides [21,22]. For example,  
62 studies on genetic structure in populations of *Aedes aegypti*, dengue, chikungunya, and Zika  
63 vector, in two locations of Queensland, Australia, indicated that said locations were partially

64 isolated genetically, with these two sites being adequate for the release of mosquitos infected  
65 with *Wolbachia pipientis* because it was important to restrict the strain released during the  
66 initial implementation phases [23,24]. Thereafter, mosquitos infected with *Wolbachia*  
67 *pipientis* were released with successful establishment in both locations, thus, suppressing  
68 dengue transmission [25].

69 Molecular markers are widely used to understand the biology and population  
70 dynamics of vector species of diseases [26]. Among the molecular markers used in population  
71 genetics studies in *A. vexans*, the mitochondrial DNA (mtDNA) sequences are broadly used  
72 due to properties, like their abundance in the organism, size and small genomic structure,  
73 rapid rate of evolution, and exclusive maternal inheritance with low genetic recombination  
74 [27]. However, one of the disadvantages of using mtDNA in population genetics and  
75 phylogenetic studies is NUMTs presence, result of the translocation of mitochondrial  
76 sequences of the mitochondrial genome for the nuclear genome [28]. Furthermore, this type  
77 of information is freely available in the GenBank and Boldsystem databases. Particularly for  
78 *A. vexans*, until now, nobody has analyzed the genetic information available within a global  
79 context. This work sought to know the global panorama of genetic diversity and gene flow of  
80 *A. vexans*, using mtDNA sequences available in GenBank and Boldsystem.

## 81 **Materials and Methods**

82 A prior search in GenBank permitted detecting that the mtDNA Cytochrome oxidase subunit I  
83 (COI) gene was the most representative, and given that Boldsystem is this marker's  
84 depository, it was also determined to work with it. For this, partial nucleotide sequences were  
85 obtained from the mitochondrial (mtDNA) COI gene deposited in GenBank and Boldsystem  
86 for *A. vexans*. The search criteria in GenBank used the words *Aedes vexans* AND COI, while  
87 for Boldsystem, it only used *Aedes vexans*. The sequences obtained were analyzed by using  
88 the BLAST tool in the NCBI website (<http://blast.ncbi.nlm.nih.gov/Blast.cgi>) to confirm  
89 identity with *A. vexans* and only sequences with identity percentage between 98% and 100%  
90 were considered in our analysis. Thereafter, the sequences selected were classified according  
91 to continent and country, so that analyses listed ahead were performed for each of them. In  
92 addition, for each sequence, geographic data were extracted to later geo-reference it on a map;  
93 sequences without geographic information were eliminated from the analysis. These data  
94 were filtered and organized through the RStudio platform by using Bold packages version 0.9  
95 [29] and Ape version 5.3 [30].

96 Then, the sequences were aligned by using the MAFFT software version 7 to later  
97 detect haplotypes (H) [31]. Each haplotype was numbered based on its frequency, thus, the  
98 most frequent was H1, the following H2, and so forth. To detect potential NUMTs among the  
99 H detected, additional stop codons were searched for in the alignment [28]. In case of  
100 detecting any NUMT, it was reported and removed from the analysis. With H without  
101 NUMTs, the haplotype network was constructed through the Pegas package version 0.11 [32]  
102 in the RStudio platform [33].

103 Diversity and neutrality tests were estimated by using the DnaSP program version 6.0  
104 [34]. The analysis of molecular variance (AMOVA) was conducted by using the Arlequin

105 program version 3.5 [35], which evaluated the variation between continents and countries.  
106 Population genetic structuring was tested by using the fixation index ( $F_{ST}$ ) proposed by  
107 Wright [36], and the gene flow ( $N_m$ ) was calculated through the Arlequin program version  
108 3.5 [35]. In cases in which statistically significant differences were obtained, the Bonferroni  
109 correction was used to verify the existence of significant differences.

110 To test isolation by distance, Mantel's test was carried out to estimate the correlation  
111 between genetic distance ( $F_{ST}$ ) and geographic distance (Km) using the Vegan package  
112 version 2.5 [37] on the RStudio platform [33]. The geographic distances were obtained by  
113 calculating with the Geographic Distance Matrix Generator program version 1.2.3. To  
114 estimate the genetic affinity of *A. vexans* populations, a phylogenetic reconstruction was  
115 performed using maximum likelihood (ML) and Bayesian inference (BI) from the haplotypes  
116 found. For this, we initially searched for the nucleotide substitution model that best fits our  
117 data in the program jModelTest version 2.1.1, which selected the model with the lowest value  
118 from the Akaike information criterion, AIC, [38]. Then, the model selected was used for the  
119 phylogenetic reconstruction under the ML and BI approach. The ML analysis was conducted  
120 with the RAxML software [39], under the following parameters: ML+ thorough Bootstrap  
121 and 1,000 boot replicas. In turn, the BI analysis was conducted in the Mr.Bayes program  
122 version 3.2.7, under the following parameters: number of generations = 2,000,000, with  $\sigma <$   
123 0.01 of the frequencies to indicate robustness of the phylogenetic hypothesis [40]. The  
124 visualization and editing of the phylogenetic trees obtained was carried out in Mr.Ent version  
125 2.5 [41].

126

## 127 **Results**

128 Between April and May 2020, the study recovered 2,420 sequences from the Boldsystem  
129 (82.64%) and GenBank (17.35%) databases, distributed among America (94.50%), Europe  
130 (3.68%), Asia (1.23%), and Africa (0.58%) with median length of 467 bp, varying between  
131 114 and 879 bp. Nevertheless, once the alignment was made, 1,184 sequences were selected  
132 from these with a length of 340 bp each, all distributed among the continents mentioned.  
133 Among the sequences selected, the American continent had the highest representation  
134 (88.60%), followed by Europe (7.35%), Asia (3.89%), and Africa (0.17%). The American  
135 continent was represented with sequences from Canada (64.10%) and the United States  
136 (24.49%). Europe was represented by Sweden (2.87%), Belgium (1.35%), Spain (1.27%),  
137 Netherlands (0.84%), Austria (1.35%), Germany (0.17%), Rumania (0.17%), Germany  
138 (0.17%), Kosovo (0.17%), Hungary (0.17 %), and Turkey (0.17%). Asia was represented by  
139 Japan (1.10%), China (1.10%), Iran (0.59%), Russia (0.42%), Singapore (0.25%), South  
140 Korea (0.25%), and India (0.17%). Finally, Africa was represented only by South Africa  
141 (0.17%).

142 Table 1 shows the global distribution of the haplotypes observed. In total, 395 H were  
143 observed, with H1 being the most frequent (24.58%), followed by H2 (7.77%), H3 (4.39%),  
144 H4 (3.38%), H5 (2.28%), H6 - H11 ranging between 1.86% (H6) and 1.10% (H11), and H112  
145 - H395 varying between 0.93% (H112) and 0.08% (H395). Although H1 was the most  
146 frequent, it was only observed in Canada and the USA. Nevertheless, the haplotype with the  
147 greatest distribution was H7, which was present in eight countries, that is, Austria (11.76%),  
148 Belgium (17.64%), Hungary (11.76%), Kosovo (5.88%), Netherlands (17.64%), Russia  
149 (5.88%), Spain (11.76%), and Sweden (17.64%). None of the H had presence of NUMTs  
150 (Supplementary material). Figure 1 displays the locations where the genetic material analyzed  
151 was extracted (Fig. 1A), as well as the phylogenetic relationships between populations, as



152 arrows observed in the haplotype network (Fig. 1B). From this, it may be stated that native  
 153 populations of *A. vexans* from America invaded some countries in Africa and Europe, and  
 154 from there established themselves in other countries in these continents and in Asia.

| Haplotype | Continent |        |      |        | Access code   | Reference                                                             |
|-----------|-----------|--------|------|--------|---------------|-----------------------------------------------------------------------|
|           | America   | Africa | Asia | Europe |               |                                                                       |
| H1        | 291       | 0      | 0    | 0      | ACMC131-04    | [42]                                                                  |
| H2        | 92        | 0      | 0    | 0      | ACMC277-04    | [42]                                                                  |
| H3        | 52        | 0      | 0    | 0      | CNEIF006-12   | [43]                                                                  |
| H4        | 40        | 0      | 0    | 0      | ACMC276-04    | [42]                                                                  |
| H5        | 27        | 0      | 0    | 0      | CNGSD2112-15  | [43]                                                                  |
| H6        | 0         | 0      | 0    | 22     | CULBE143-14   | [44]                                                                  |
| H7        | 0         | 0      | 0    | 17     | GBMIN56980-17 | [44]                                                                  |
| H8        | 15        | 0      | 0    | 0      | ASDIP113-15   | <a href="http://www.boldsystems.org/">http://www.boldsystems.org/</a> |
| H9        | 13        | 0      | 0    | 0      | ACMC289-04    | [42]                                                                  |
| H10       | 12        | 0      | 0    | 0      | BBDCP596-10   | <a href="http://www.boldsystems.org/">http://www.boldsystems.org/</a> |
| H11       | 13        | 0      | 0    | 0      | CNPAD261-13   | [43]                                                                  |
| H12       | 11        | 0      | 0    | 0      | CNEIF841-12   | [43]                                                                  |
| H13       | 10        | 0      | 0    | 0      | CNEIF861-12   | [43]                                                                  |
| H14       | 9         | 0      | 0    | 0      | ASDMT244-11   | [43]                                                                  |
| H15       | 9         | 0      | 0    | 0      | ACMC290-04    | [42]                                                                  |
| H16       | 7         | 0      | 0    | 0      | CNGSD6857-15  | [43]                                                                  |
| H17       | 7         | 0      | 0    | 0      | CNGSD860-15   | [43]                                                                  |
| H18       | 7         | 0      | 0    | 0      | CNJAE1246-12  | [43]                                                                  |
| H19       | 7         | 0      | 0    | 0      | CNPAF983-13   | [43]                                                                  |
| H20       | 7         | 0      | 0    | 0      | SSJAE8713-13  | [43]                                                                  |
| H21       | 6         | 0      | 0    | 0      | CNJAE1248-12  | [43]                                                                  |
| H22       | 0         | 0      | 8    | 0      | GBDP47430-19  | [45]                                                                  |
| H23       | 5         | 0      | 0    | 0      | CNEIF812-12   | [43]                                                                  |
| H24       | 5         | 0      | 0    | 0      | MBIOI074-13   | [43]                                                                  |
| H25       | 5         | 0      | 0    | 0      | RRSSA3576-15  | [49]                                                                  |
| H26       | 5         | 0      | 0    | 0      | SSEIC6245-13  | [43]                                                                  |
| H27       | 5         | 0      | 0    | 0      | SSJAE8835-13  | [43]                                                                  |
| H28       | 0         | 0      | 0    | 4      | CULBE132-14   | [44]                                                                  |
| H29       | 4         | 0      | 0    | 0      | ACMC104-04    | [42]                                                                  |
| H30       | 4         | 0      | 0    | 0      | CNEIG153-12   | [43]                                                                  |
| H31       | 4         | 0      | 0    | 0      | CNGSD1517-15  | [43]                                                                  |
| H32       | 4         | 0      | 0    | 0      | CNPAD244-13   | [43]                                                                  |
| H33       | 4         | 0      | 0    | 0      | PHJUL2502-11  | [43]                                                                  |
| H34       | 4         | 0      | 0    | 0      | SSEIC5403-13  | [43]                                                                  |
| H35       | 4         | 0      | 0    | 0      | SSEIC5955-13  | [43]                                                                  |
| H36       | 4         | 0      | 0    | 0      | SSEIC6896-13  | [43]                                                                  |
| H37       | 4         | 0      | 0    | 0      | SSJAE8703-13  | [43]                                                                  |

|     |   |   |   |   |               |                                                                       |
|-----|---|---|---|---|---------------|-----------------------------------------------------------------------|
| H38 | 4 | 0 | 0 | 0 | SSJAE9027-13  | [43]                                                                  |
| H39 | 0 | 0 | 0 | 4 | GBDP48120-19  | [48]                                                                  |
| H40 | 3 | 0 | 0 | 0 | CNEIF014-12   | [43]                                                                  |
| H41 | 3 | 0 | 0 | 0 | CNEIF817-12   | [43]                                                                  |
| H42 | 3 | 0 | 0 | 0 | CNEIF830-12   | [43]                                                                  |
| H43 | 3 | 0 | 0 | 0 | CNEIG182-12   | [43]                                                                  |
| H44 | 3 | 0 | 0 | 0 | CNGSI1668-15  | [43]                                                                  |
| H45 | 3 | 0 | 0 | 0 | CNRME208-12   | [43]                                                                  |
| H46 | 3 | 0 | 0 | 0 | PHAUG1312-11  | [43]                                                                  |
| H47 | 3 | 0 | 0 | 0 | SMTPJ4980-14  | [43]                                                                  |
| H48 | 3 | 0 | 0 | 0 | SSEIA4548-13  | [43]                                                                  |
| H49 | 3 | 0 | 0 | 0 | SSEIA5279-13  | [43]                                                                  |
| H50 | 3 | 0 | 0 | 0 | SSEIA5341-13  | [43]                                                                  |
| H51 | 3 | 0 | 0 | 0 | SSJAF9177-13  | [43]                                                                  |
| H52 | 3 | 0 | 0 | 0 | SSPAC12518-13 | [43]                                                                  |
| H53 | 3 | 0 | 0 | 0 | SSPPA9368-15  | [43]                                                                  |
| H54 | 0 | 0 | 3 | 0 | MK962499      | [50]                                                                  |
| H55 | 0 | 0 | 3 | 0 | AB738099      | [45]                                                                  |
| H56 | 0 | 0 | 0 | 3 | GBMIN56959-17 | [48]                                                                  |
| H57 | 3 | 0 | 0 | 0 | IUP1017-14    | <a href="http://www.boldsystems.org/">http://www.boldsystems.org/</a> |
| H58 | 0 | 0 | 0 | 2 | CULBE140-14   | [44]                                                                  |
| H59 | 2 | 0 | 0 | 0 | ACMC033-04    | [42]                                                                  |
| H60 | 2 | 0 | 0 | 0 | BBDCM210-10   | [43]                                                                  |
| H61 | 2 | 0 | 0 | 0 | CNEIF002-12   | [43]                                                                  |
| H62 | 2 | 0 | 0 | 0 | CNEIF798-12   | [43]                                                                  |
| H63 | 2 | 0 | 0 | 0 | CNGSE2411-15  | [43]                                                                  |
| H64 | 2 | 0 | 0 | 0 | CNGSI1097-15  | [43]                                                                  |
| H65 | 2 | 0 | 0 | 0 | CNPKO3332-14  | [43]                                                                  |
| H66 | 2 | 0 | 0 | 0 | CNRME207-12   | [43]                                                                  |
| H67 | 2 | 0 | 0 | 0 | CNRME2449-12  | [43]                                                                  |
| H68 | 2 | 0 | 0 | 0 | CNRME4093-12  | [43]                                                                  |
| H69 | 2 | 0 | 0 | 0 | CNRMG626-12   | [43]                                                                  |
| H70 | 2 | 0 | 0 | 0 | CNTIH462-15   | [43]                                                                  |
| H71 | 2 | 0 | 0 | 0 | GMOKH968-15   | [43]                                                                  |
| H72 | 2 | 0 | 0 | 0 | SSEIA3424-13  | [43]                                                                  |
| H73 | 2 | 0 | 0 | 0 | SSEIA3430-13  | [43]                                                                  |
| H74 | 2 | 0 | 0 | 0 | SSEIA5215-13  | [43]                                                                  |
| H75 | 2 | 0 | 0 | 0 | SSEIA5266-13  | [43]                                                                  |
| H76 | 2 | 0 | 0 | 0 | SSJAE1181-13  | [43]                                                                  |
| H77 | 2 | 0 | 0 | 0 | SSJAE8706-13  | [43]                                                                  |
| H78 | 2 | 0 | 0 | 0 | SSJAF9208-13  | [43]                                                                  |
| H79 | 2 | 0 | 0 | 0 | SSPAB8912-13  | [43]                                                                  |
| H80 | 2 | 0 | 0 | 0 | SSPAC12020-13 | [43]                                                                  |
| H81 | 2 | 0 | 0 | 0 | SSPPA5271-15  | [43]                                                                  |
| H82 | 2 | 0 | 0 | 0 | SSPPA5483-15  | [43]                                                                  |

|      |   |   |   |   |               |                                                                       |
|------|---|---|---|---|---------------|-----------------------------------------------------------------------|
| H83  | 2 | 0 | 0 | 0 | SSPPA9400-15  | [43]                                                                  |
| H84  | 0 | 0 | 2 | 0 | GBDP47423-19  | [45]                                                                  |
| H85  | 0 | 0 | 2 | 0 | AB738168-     | [45]                                                                  |
| H86  | 0 | 0 | 0 | 2 | GBMIN56950-17 | [46]                                                                  |
| H87  | 0 | 0 | 1 | 1 | LRMQS005-17   | [47]                                                                  |
| H88  | 0 | 0 | 1 | 1 | GBDP48149-19  | [48]                                                                  |
| H89  | 0 | 0 | 1 | 1 | GBDP48185-19  | [48]                                                                  |
| H90  | 0 | 0 | 1 | 1 | GBDP48490-19  | [48]                                                                  |
| H91  | 0 | 0 | 0 | 2 | GBMIN56961-17 | [48]                                                                  |
| H92  | 2 | 0 | 0 | 0 | MOSN025-17    | <a href="http://www.boldsystems.org/">http://www.boldsystems.org/</a> |
| H93  | 2 | 0 | 0 | 0 | MOSN050-17    | <a href="http://www.boldsystems.org/">http://www.boldsystems.org/</a> |
| H94  | 2 | 0 | 0 | 0 | MOSN1411-18   | <a href="http://www.boldsystems.org/">http://www.boldsystems.org/</a> |
| H95  | 1 | 0 | 0 | 0 | MOSN1957-18   | <a href="http://www.boldsystems.org/">http://www.boldsystems.org/</a> |
| H96  | 1 | 0 | 0 | 0 | MOSN2259-19   | <a href="http://www.boldsystems.org/">http://www.boldsystems.org/</a> |
| H97  | 1 | 0 | 0 | 0 | MOSN2970-19   | <a href="http://www.boldsystems.org/">http://www.boldsystems.org/</a> |
| H98  | 0 | 0 | 0 | 1 | CULBE141-14   | [44]                                                                  |
| H99  | 0 | 0 | 0 | 1 | CULBE145-14   | [44]                                                                  |
| H100 | 0 | 0 | 0 | 1 | GMOXH2148-15  | [43]                                                                  |
| H101 | 0 | 0 | 0 | 1 | CULBE136-14   | [44]                                                                  |
| H102 | 0 | 0 | 0 | 1 | CULBE138-14   | [44]                                                                  |
| H103 | 0 | 0 | 0 | 1 | CULBE139-14   | [44]                                                                  |
| H104 | 1 | 0 | 0 | 0 | ACMC053-04    | [42]                                                                  |
| H105 | 1 | 0 | 0 | 0 | ACMC288-04    | [42]                                                                  |
| H106 | 1 | 0 | 0 | 0 | ASDMT1059-11  | [43]                                                                  |
| H107 | 1 | 0 | 0 | 0 | BBDCN133-10   | [43]                                                                  |
| H108 | 1 | 0 | 0 | 0 | BBDCN233-10   | [43]                                                                  |
| H109 | 1 | 0 | 0 | 0 | BBDCP593-10   | [43]                                                                  |
| H110 | 1 | 0 | 0 | 0 | CNEIF015-12   | [43]                                                                  |
| H111 | 1 | 0 | 0 | 0 | CNEIF023-12   | [43]                                                                  |
| H112 | 1 | 0 | 0 | 0 | CNEIF3339-12  | [43]                                                                  |
| H113 | 1 | 0 | 0 | 0 | CNEIF793-12   | [43]                                                                  |
| H114 | 1 | 0 | 0 | 0 | CNEIF813-12   | [43]                                                                  |
| H115 | 1 | 0 | 0 | 0 | CNEIF849-12   | [43]                                                                  |
| H116 | 1 | 0 | 0 | 0 | CNEIG1456-12  | [43]                                                                  |
| H117 | 1 | 0 | 0 | 0 | CNEIG152-12   | [43]                                                                  |
| H118 | 1 | 0 | 0 | 0 | CNFNH1033-14  | [43]                                                                  |
| H119 | 1 | 0 | 0 | 0 | CNGRD1138-12  | [43]                                                                  |
| H120 | 1 | 0 | 0 | 0 | CNGSD1018-15  | [43]                                                                  |
| H121 | 1 | 0 | 0 | 0 | CNGSD132-15   | [43]                                                                  |
| H122 | 1 | 0 | 0 | 0 | CNGSD1611-15  | [43]                                                                  |
| H123 | 1 | 0 | 0 | 0 | CNGSD263-15   | [43]                                                                  |
| H124 | 1 | 0 | 0 | 0 | CNGSE1406-15  | [43]                                                                  |
| H125 | 1 | 0 | 0 | 0 | CNGSE2070-15  | [43]                                                                  |
| H126 | 1 | 0 | 0 | 0 | CNGSE2173-15  | [43]                                                                  |
| H127 | 1 | 0 | 0 | 0 | CNGSG1207-15  | [43]                                                                  |

|      |   |   |   |   |              |                                                                       |
|------|---|---|---|---|--------------|-----------------------------------------------------------------------|
| H128 | 1 | 0 | 0 | 0 | CNGSG122-15  | [43]                                                                  |
| H129 | 1 | 0 | 0 | 0 | CNGSI1101-15 | [43]                                                                  |
| H130 | 1 | 0 | 0 | 0 | CNGSI1218-15 | [43]                                                                  |
| H131 | 1 | 0 | 0 | 0 | CNGSI1988-15 | [43]                                                                  |
| H132 | 1 | 0 | 0 | 0 | CNGSI246-15  | [43]                                                                  |
| H133 | 1 | 0 | 0 | 0 | CNGSI326-15  | [43]                                                                  |
| H134 | 1 | 0 | 0 | 0 | CNGSI582-15  | [43]                                                                  |
| H135 | 1 | 0 | 0 | 0 | CNJAE1277-12 | [43]                                                                  |
| H136 | 1 | 0 | 0 | 0 | CNJAE965-12  | [43]                                                                  |
| H137 | 1 | 0 | 0 | 0 | CNJAF2111-12 | [43]                                                                  |
| H138 | 1 | 0 | 0 | 0 | CNJAF2114-12 | [43]                                                                  |
| H139 | 1 | 0 | 0 | 0 | CNJAF2142-12 | [43]                                                                  |
| H140 | 1 | 0 | 0 | 0 | CNPAD242-13  | [43]                                                                  |
| H141 | 1 | 0 | 0 | 0 | CNPAD260-13  | [43]                                                                  |
| H142 | 1 | 0 | 0 | 0 | CNPPC1400-12 | [43]                                                                  |
| H143 | 1 | 0 | 0 | 0 | CNPPC1722-12 | [43]                                                                  |
| H144 | 1 | 0 | 0 | 0 | CNRME198-12  | [43]                                                                  |
| H145 | 1 | 0 | 0 | 0 | CNRME2450-12 | [43]                                                                  |
| H146 | 1 | 0 | 0 | 0 | CNRMG169-12  | [43]                                                                  |
| H147 | 1 | 0 | 0 | 0 | CNROH071-13  | [43]                                                                  |
| H148 | 1 | 0 | 0 | 0 | CNTIH336-15  | [43]                                                                  |
| H149 | 1 | 0 | 0 | 0 | CNWBC188-13  | [43]                                                                  |
| H150 | 1 | 0 | 0 | 0 | CNWBH228-13  | [43]                                                                  |
| H151 | 1 | 0 | 0 | 0 | CNWBH672-13  | [43]                                                                  |
| H152 | 1 | 0 | 0 | 0 | GMOKH2148-15 | [43]                                                                  |
| H153 | 1 | 0 | 0 | 0 | JSJUN1501-11 | [43]                                                                  |
| H154 | 1 | 0 | 0 | 0 | MSQ002-04    | <a href="http://www.boldsystems.org/">http://www.boldsystems.org/</a> |
| H155 | 1 | 0 | 0 | 0 | MSQ003-04    | <a href="http://www.boldsystems.org/">http://www.boldsystems.org/</a> |
| H156 | 1 | 0 | 0 | 0 | MSQ015-04    | <a href="http://www.boldsystems.org/">http://www.boldsystems.org/</a> |
| H157 | 1 | 0 | 0 | 0 | MSQ022-04    | <a href="http://www.boldsystems.org/">http://www.boldsystems.org/</a> |
| H158 | 1 | 0 | 0 | 0 | NCCA889-11   | [43]                                                                  |
| H159 | 1 | 0 | 0 | 0 | NCCA895-11   | [43]                                                                  |
| H160 | 1 | 0 | 0 | 0 | PHAUG1277-11 | [43]                                                                  |
| H161 | 1 | 0 | 0 | 0 | PHAUG1318-11 | [43]                                                                  |
| H162 | 1 | 0 | 0 | 0 | PHSEP1211-11 | [43]                                                                  |
| H163 | 1 | 0 | 0 | 0 | PREXP286-14  | <a href="http://www.boldsystems.org/">http://www.boldsystems.org/</a> |
| H164 | 1 | 0 | 0 | 0 | RRINV213-15  | [49]                                                                  |
| H165 | 1 | 0 | 0 | 0 | RRINV3712-15 | [49]                                                                  |
| H166 | 1 | 0 | 0 | 0 | RRINV3721-15 | [49]                                                                  |
| H167 | 1 | 0 | 0 | 0 | RRINV3723-15 | [49]                                                                  |
| H168 | 1 | 0 | 0 | 0 | RRINV3798-15 | [49]                                                                  |
| H169 | 1 | 0 | 0 | 0 | RRMF14275-15 | [49]                                                                  |
| H170 | 1 | 0 | 0 | 0 | RRSSA425-15  | [49]                                                                  |
| H171 | 1 | 0 | 0 | 0 | SMTPI2660-14 | [43]                                                                  |
| H172 | 1 | 0 | 0 | 0 | SMTPI3303-14 | [43]                                                                  |
| H173 | 1 | 0 | 0 | 0 | SSBAE5601-13 | [43]                                                                  |

|      |   |   |   |   |               |      |
|------|---|---|---|---|---------------|------|
| H174 | 1 | 0 | 0 | 0 | SSBAE5713-13  | [43] |
| H175 | 1 | 0 | 0 | 0 | SSEIA3425-13  | [43] |
| H176 | 1 | 0 | 0 | 0 | SSEIA4525-13  | [43] |
| H177 | 1 | 0 | 0 | 0 | SSEIA5135-13  | [43] |
| H178 | 1 | 0 | 0 | 0 | SSEIA5184-13  | [43] |
| H179 | 1 | 0 | 0 | 0 | SSEIA5193-13  | [43] |
| H180 | 1 | 0 | 0 | 0 | SSEIA5225-13  | [43] |
| H181 | 1 | 0 | 0 | 0 | SSEIA5296-13  | [43] |
| H182 | 1 | 0 | 0 | 0 | SSEIA5301-13  | [43] |
| H183 | 1 | 0 | 0 | 0 | SSEIA5335-13  | [43] |
| H184 | 1 | 0 | 0 | 0 | SSEIC5215-13  | [43] |
| H185 | 1 | 0 | 0 | 0 | SSEIC5397-13  | [43] |
| H186 | 1 | 0 | 0 | 0 | SSEIC5788-13  | [43] |
| H187 | 1 | 0 | 0 | 0 | SSEIC5981-13  | [43] |
| H188 | 1 | 0 | 0 | 0 | SSEIC6590-13  | [43] |
| H189 | 1 | 0 | 0 | 0 | SSEIC6788-13  | [43] |
| H190 | 1 | 0 | 0 | 0 | SSEIC6792-13  | [43] |
| H191 | 1 | 0 | 0 | 0 | SSEIC6946-13  | [43] |
| H192 | 1 | 0 | 0 | 0 | SSEID823-13   | [43] |
| H193 | 1 | 0 | 0 | 0 | SSJAE10960-13 | [43] |
| H194 | 1 | 0 | 0 | 0 | SSJAE11005-13 | [43] |
| H195 | 1 | 0 | 0 | 0 | SSJAE5456-13  | [43] |
| H196 | 1 | 0 | 0 | 0 | SSJAE6982-13  | [43] |
| H197 | 1 | 0 | 0 | 0 | SSJAE7467-13  | [43] |
| H198 | 1 | 0 | 0 | 0 | SSJAE8697-13  | [43] |
| H199 | 1 | 0 | 0 | 0 | SSJAE8710-13  | [43] |
| H200 | 1 | 0 | 0 | 0 | SSJAE8721-13  | [43] |
| H201 | 1 | 0 | 0 | 0 | SSJAE8767-13  | [43] |
| H202 | 1 | 0 | 0 | 0 | SSJAE8770-13  | [43] |
| H203 | 1 | 0 | 0 | 0 | SSJAE8773-13  | [43] |
| H204 | 1 | 0 | 0 | 0 | SSJAE8790-13  | [43] |
| H205 | 1 | 0 | 0 | 0 | SSJAE8802-13  | [43] |
| H206 | 1 | 0 | 0 | 0 | SSJAE8804-13  | [43] |
| H207 | 1 | 0 | 0 | 0 | SSJAE8810-13  | [43] |
| H208 | 1 | 0 | 0 | 0 | SSJAE8842-13  | [43] |
| H209 | 1 | 0 | 0 | 0 | SSJAE8865-13  | [43] |
| H210 | 1 | 0 | 0 | 0 | SSJAE8905-13  | [43] |
| H211 | 1 | 0 | 0 | 0 | SSJAE8909-13  | [43] |
| H212 | 1 | 0 | 0 | 0 | SSJAE8962-13  | [43] |
| H213 | 1 | 0 | 0 | 0 | SSJAE8972-13  | [43] |
| H214 | 1 | 0 | 0 | 0 | SSJAE8997-13  | [43] |
| H215 | 1 | 0 | 0 | 0 | SSJAE9009-13  | [43] |
| H216 | 1 | 0 | 0 | 0 | SSJAE9068-13  | [43] |
| H217 | 1 | 0 | 0 | 0 | SSJAF10000-13 | [43] |
| H218 | 1 | 0 | 0 | 0 | SSJAF10014-13 | [43] |
| H219 | 1 | 0 | 0 | 0 | SSJAF10300-13 | [43] |

|      |   |   |   |   |               |      |
|------|---|---|---|---|---------------|------|
| H220 | 1 | 0 | 0 | 0 | SSJAF10307-13 | [43] |
| H221 | 1 | 0 | 0 | 0 | SSJAF10358-13 | [43] |
| H222 | 1 | 0 | 0 | 0 | SSJAF10367-13 | [43] |
| H223 | 1 | 0 | 0 | 0 | SSJAF259-13   | [43] |
| H224 | 1 | 0 | 0 | 0 | SSJAF5420-13  | [43] |
| H225 | 1 | 0 | 0 | 0 | SSJAF9159-13  | [43] |
| H226 | 1 | 0 | 0 | 0 | SSJAF9168-13  | [43] |
| H227 | 1 | 0 | 0 | 0 | SSJAF9715-13  | [43] |
| H228 | 1 | 0 | 0 | 0 | SSJAF9963-13  | [43] |
| H229 | 1 | 0 | 0 | 0 | SSPAA9388-13  | [43] |
| H230 | 1 | 0 | 0 | 0 | SSPAA9453-13  | [43] |
| H231 | 1 | 0 | 0 | 0 | SSPAA9670-13  | [43] |
| H232 | 1 | 0 | 0 | 0 | SSPAA9697-13  | [43] |
| H233 | 1 | 0 | 0 | 0 | SSPAA9698-13  | [43] |
| H234 | 1 | 0 | 0 | 0 | SSPAC11523-13 | [43] |
| H235 | 1 | 0 | 0 | 0 | SSPAC11881-13 | [43] |
| H236 | 1 | 0 | 0 | 0 | SSPAC12030-13 | [43] |
| H237 | 1 | 0 | 0 | 0 | SSPAC12040-13 | [43] |
| H238 | 1 | 0 | 0 | 0 | SSPAC12053-13 | [43] |
| H239 | 1 | 0 | 0 | 0 | SSPAC12068-13 | [43] |
| H240 | 1 | 0 | 0 | 0 | SSPAC12075-13 | [43] |
| H241 | 1 | 0 | 0 | 0 | SSPAC12104-13 | [43] |
| H242 | 1 | 0 | 0 | 0 | SSPAC12117-13 | [43] |
| H243 | 1 | 0 | 0 | 0 | SSPAC12132-13 | [43] |
| H244 | 1 | 0 | 0 | 0 | SSPAC12142-13 | [43] |
| H245 | 1 | 0 | 0 | 0 | SSPAC12161-13 | [43] |
| H246 | 1 | 0 | 0 | 0 | SSPAC12173-13 | [43] |
| H247 | 1 | 0 | 0 | 0 | SSPAC12503-13 | [43] |
| H248 | 1 | 0 | 0 | 0 | SSPAC1637-13  | [43] |
| H249 | 1 | 0 | 0 | 0 | SSPPA3871-15  | [43] |
| H250 | 1 | 0 | 0 | 0 | SSPPA4038-15  | [43] |
| H251 | 1 | 0 | 0 | 0 | SSPPA4045-15  | [43] |
| H252 | 1 | 0 | 0 | 0 | SSPPA4260-15  | [43] |
| H253 | 1 | 0 | 0 | 0 | SSPPA4386-15  | [43] |
| H254 | 1 | 0 | 0 | 0 | SSPPA5066-15  | [43] |
| H255 | 1 | 0 | 0 | 0 | SSPPA5187-15  | [43] |
| H256 | 1 | 0 | 0 | 0 | SSPPA5299-15  | [43] |
| H257 | 1 | 0 | 0 | 0 | SSPPA5324-15  | [43] |
| H258 | 1 | 0 | 0 | 0 | SSPPA5593-15  | [43] |
| H259 | 1 | 0 | 0 | 0 | SSPPA5622-15  | [43] |
| H260 | 1 | 0 | 0 | 0 | SSPPA8632-15  | [43] |
| H261 | 1 | 0 | 0 | 0 | SSPPA8661-15  | [43] |
| H262 | 1 | 0 | 0 | 0 | SSPPA8754-15  | [43] |

|      |   |   |   |   |               |                                                                       |
|------|---|---|---|---|---------------|-----------------------------------------------------------------------|
| H263 | 1 | 0 | 0 | 0 | SSPPA8797-15  | [43]                                                                  |
| H264 | 1 | 0 | 0 | 0 | SSPPA8894-15  | [43]                                                                  |
| H265 | 1 | 0 | 0 | 0 | SSPPA8942-15  | [43]                                                                  |
| H266 | 1 | 0 | 0 | 0 | SSPPA8947-15  | [43]                                                                  |
| H267 | 1 | 0 | 0 | 0 | SSPPA9373-15  | [43]                                                                  |
| H268 | 1 | 0 | 0 | 0 | SSPPA9424-15  | [43]                                                                  |
| H269 | 1 | 0 | 0 | 0 | SSPPA9526-15  | [43]                                                                  |
| H270 | 1 | 0 | 0 | 0 | TTDBW601-09   | [43]                                                                  |
| H271 | 1 | 0 | 0 | 0 | TTMDJ190-10   | [43]                                                                  |
| H272 | 0 | 0 | 1 | 0 | GBDP47418-19  | [45]                                                                  |
| H273 | 0 | 0 | 1 | 0 | GBDP47419-19  | [45]                                                                  |
| H274 | 0 | 0 | 1 | 0 | GBDP47420-19  | [45]                                                                  |
| H275 | 0 | 0 | 1 | 0 | GBDP47421-19  | [45]                                                                  |
| H276 | 0 | 0 | 1 | 0 | GBDP47422-19  | [45]                                                                  |
| H277 | 0 | 0 | 1 | 0 | GBDP47424-19  | [45]                                                                  |
| H278 | 0 | 0 | 1 | 0 | GBDP47425-19  | [45]                                                                  |
| H279 | 0 | 0 | 1 | 0 | GBDP47427-19  | [45]                                                                  |
| H280 | 0 | 0 | 1 | 0 | GBDP47428-19  | [45]                                                                  |
| H281 | 0 | 0 | 1 | 0 | GBDP47429-19  | [45]                                                                  |
| H282 | 0 | 0 | 0 | 1 | GBMIN56977-17 | [45]                                                                  |
| H283 | 0 | 0 | 0 | 1 | GBMIN56977-18 | [49]                                                                  |
| H284 | 0 | 0 | 1 | 0 | MK962500      | [50]                                                                  |
| H285 | 0 | 0 | 1 | 0 | AB738152      | [45]                                                                  |
| H286 | 0 | 0 | 1 | 0 | AB738264      | [45]                                                                  |
| H287 | 0 | 0 | 1 | 0 | LC054400      | [51]                                                                  |
| H288 | 0 | 0 | 1 | 0 | LC054401      | [51]                                                                  |
| H289 | 0 | 0 | 1 | 0 | LC054402      | [51]                                                                  |
| H290 | 0 | 0 | 1 | 0 | LC054403      | [51]                                                                  |
| H291 | 0 | 0 | 1 | 0 | LC054404      | [51]                                                                  |
| H292 | 0 | 0 | 1 | 0 | GBDCU003-12   | [52]                                                                  |
| H293 | 0 | 0 | 0 | 1 | GBMNA38704-19 | [52]                                                                  |
| H294 | 0 | 0 | 0 | 1 | MK403546      | [53]                                                                  |
| H295 | 0 | 0 | 0 | 1 | GBMIN56951-17 | [46]                                                                  |
| H296 | 0 | 0 | 1 | 0 | GBDP14515-13  | [52]                                                                  |
| H297 | 0 | 0 | 1 | 0 | GBDP14517-13  | [52]                                                                  |
| H298 | 0 | 1 | 0 | 0 | CULSA041-19   | <a href="http://www.boldsystems.org/">http://www.boldsystems.org/</a> |
| H299 | 0 | 1 | 0 | 0 | CULSA043-19   | <a href="http://www.boldsystems.org/">http://www.boldsystems.org/</a> |
| H300 | 0 | 0 | 1 | 0 | GBDP48513-19  | [45]                                                                  |
| H301 | 0 | 0 | 1 | 0 | GBMIN56978-17 | [44]                                                                  |
| H302 | 0 | 0 | 1 | 0 | GBMIN56979-17 | [44]                                                                  |
| H303 | 0 | 0 | 0 | 1 | LRMQS002-17   | [47]                                                                  |
| H304 | 0 | 0 | 0 | 1 | LRMQS035-17   | [47]                                                                  |
| H305 | 0 | 0 | 0 | 1 | LRMQS066-17   | [47]                                                                  |
| H306 | 0 | 0 | 0 | 1 | MLQSR050-17   | [47]                                                                  |
| H307 | 0 | 0 | 0 | 1 | MLQSR051-17   | [47]                                                                  |

|      |   |   |   |   |               |                                                                       |
|------|---|---|---|---|---------------|-----------------------------------------------------------------------|
| H308 | 0 | 0 | 0 | 1 | MLQSR055-17   | [47]                                                                  |
| H309 | 0 | 0 | 0 | 1 | GBDP48491-19  | [48]                                                                  |
| H310 | 0 | 0 | 0 | 1 | GBDP48493-19  | [48]                                                                  |
| H311 | 0 | 0 | 0 | 1 | GBMIN56957-17 | [48]                                                                  |
| H312 | 0 | 0 | 0 | 1 | GBMIN56958-17 | [48]                                                                  |
| H313 | 0 | 0 | 0 | 1 | GBMIN56960-17 | [48]                                                                  |
| H314 | 0 | 0 | 0 | 1 | GBMIN56965-17 | [48]                                                                  |
| H315 | 0 | 0 | 0 | 1 | GBMIN56967-17 | [48]                                                                  |
| H316 | 0 | 0 | 0 | 1 | GBMIN56969-17 | [48]                                                                  |
| H317 | 0 | 0 | 0 | 1 | GBMIN56972-17 | [48]                                                                  |
| H318 | 0 | 0 | 0 | 1 | GBMIN56974-17 | [48]                                                                  |
| H319 | 1 | 0 | 0 | 0 | BBDIT1116-11  | <a href="http://www.boldsystems.org/">http://www.boldsystems.org/</a> |
| H320 | 1 | 0 | 0 | 0 | BBDIT1121-11  | <a href="http://www.boldsystems.org/">http://www.boldsystems.org/</a> |
| H321 | 1 | 0 | 0 | 0 | BBDIT1122-11  | <a href="http://www.boldsystems.org/">http://www.boldsystems.org/</a> |
| H322 | 1 | 0 | 0 | 0 | BBDIT1123-11  | <a href="http://www.boldsystems.org/">http://www.boldsystems.org/</a> |
| H323 | 1 | 0 | 0 | 0 | BBDIV1558-12  | <a href="http://www.boldsystems.org/">http://www.boldsystems.org/</a> |
| H324 | 1 | 0 | 0 | 0 | GMGAA514-13   | <a href="http://www.boldsystems.org/">http://www.boldsystems.org/</a> |
| H325 | 1 | 0 | 0 | 0 | GMGCC029-13   | <a href="http://www.boldsystems.org/">http://www.boldsystems.org/</a> |
| H326 | 1 | 0 | 0 | 0 | GMGDD139-13   | <a href="http://www.boldsystems.org/">http://www.boldsystems.org/</a> |
| H327 | 1 | 0 | 0 | 0 | IUP1014-14    | <a href="http://www.boldsystems.org/">http://www.boldsystems.org/</a> |
| H328 | 1 | 0 | 0 | 0 | IUP1016-14    | <a href="http://www.boldsystems.org/">http://www.boldsystems.org/</a> |
| H329 | 1 | 0 | 0 | 0 | IUP1018-14    | <a href="http://www.boldsystems.org/">http://www.boldsystems.org/</a> |
| H330 | 1 | 0 | 0 | 0 | IUP675-14     | <a href="http://www.boldsystems.org/">http://www.boldsystems.org/</a> |
| H331 | 1 | 0 | 0 | 0 | IUP885-14     | <a href="http://www.boldsystems.org/">http://www.boldsystems.org/</a> |
| H332 | 1 | 0 | 0 | 0 | MOSN019-17    | <a href="http://www.boldsystems.org/">http://www.boldsystems.org/</a> |
| H333 | 1 | 0 | 0 | 0 | MOSN044-17    | <a href="http://www.boldsystems.org/">http://www.boldsystems.org/</a> |
| H334 | 1 | 0 | 0 | 0 | MOSN088-17    | <a href="http://www.boldsystems.org/">http://www.boldsystems.org/</a> |
| H335 | 1 | 0 | 0 | 0 | MOSN1014-18   | <a href="http://www.boldsystems.org/">http://www.boldsystems.org/</a> |
| H336 | 1 | 0 | 0 | 0 | MOSN1083-18   | <a href="http://www.boldsystems.org/">http://www.boldsystems.org/</a> |
| H337 | 1 | 0 | 0 | 0 | MOSN1374-18   | <a href="http://www.boldsystems.org/">http://www.boldsystems.org/</a> |
| H338 | 1 | 0 | 0 | 0 | MOSN1382-18   | <a href="http://www.boldsystems.org/">http://www.boldsystems.org/</a> |
| H339 | 1 | 0 | 0 | 0 | MOSN1421-18   | <a href="http://www.boldsystems.org/">http://www.boldsystems.org/</a> |
| H340 | 1 | 0 | 0 | 0 | MOSN1424-18   | <a href="http://www.boldsystems.org/">http://www.boldsystems.org/</a> |
| H341 | 1 | 0 | 0 | 0 | MOSN1425-18   | <a href="http://www.boldsystems.org/">http://www.boldsystems.org/</a> |
| H342 | 1 | 0 | 0 | 0 | MOSN1428-18   | <a href="http://www.boldsystems.org/">http://www.boldsystems.org/</a> |
| H343 | 1 | 0 | 0 | 0 | MOSN1615-18   | <a href="http://www.boldsystems.org/">http://www.boldsystems.org/</a> |
| H344 | 1 | 0 | 0 | 0 | MOSN1652-18   | <a href="http://www.boldsystems.org/">http://www.boldsystems.org/</a> |
| H345 | 1 | 0 | 0 | 0 | MOSN179-18    | <a href="http://www.boldsystems.org/">http://www.boldsystems.org/</a> |
| H346 | 1 | 0 | 0 | 0 | MOSN1869-18   | <a href="http://www.boldsystems.org/">http://www.boldsystems.org/</a> |
| H347 | 1 | 0 | 0 | 0 | MOSN2115-19   | <a href="http://www.boldsystems.org/">http://www.boldsystems.org/</a> |
| H348 | 1 | 0 | 0 | 0 | MOSN2116-19   | <a href="http://www.boldsystems.org/">http://www.boldsystems.org/</a> |
| H349 | 1 | 0 | 0 | 0 | MOSN2480-19   | <a href="http://www.boldsystems.org/">http://www.boldsystems.org/</a> |
| H350 | 1 | 0 | 0 | 0 | MOSN2487-19   | <a href="http://www.boldsystems.org/">http://www.boldsystems.org/</a> |
| H351 | 1 | 0 | 0 | 0 | MOSN2647-19   | <a href="http://www.boldsystems.org/">http://www.boldsystems.org/</a> |



|              |             |          |           |           |              |                                                                       |
|--------------|-------------|----------|-----------|-----------|--------------|-----------------------------------------------------------------------|
| H352         | 1           | 0        | 0         | 0         | MOSN2649-19  | <a href="http://www.boldsystems.org/">http://www.boldsystems.org/</a> |
| H353         | 1           | 0        | 0         | 0         | MOSN2655-19  | <a href="http://www.boldsystems.org/">http://www.boldsystems.org/</a> |
| H354         | 1           | 0        | 0         | 0         | MOSN288-18   | <a href="http://www.boldsystems.org/">http://www.boldsystems.org/</a> |
| H355         | 1           | 0        | 0         | 0         | MOSN2897-19  | <a href="http://www.boldsystems.org/">http://www.boldsystems.org/</a> |
| H356         | 1           | 0        | 0         | 0         | MOSN2909-19  | <a href="http://www.boldsystems.org/">http://www.boldsystems.org/</a> |
| H357         | 1           | 0        | 0         | 0         | MOSN2913-19  | <a href="http://www.boldsystems.org/">http://www.boldsystems.org/</a> |
| H358         | 1           | 0        | 0         | 0         | MOSN292-18   | <a href="http://www.boldsystems.org/">http://www.boldsystems.org/</a> |
| H359         | 1           | 0        | 0         | 0         | MOSN2953-19  | <a href="http://www.boldsystems.org/">http://www.boldsystems.org/</a> |
| H360         | 1           | 0        | 0         | 0         | MOSN2978-19  | <a href="http://www.boldsystems.org/">http://www.boldsystems.org/</a> |
| H361         | 1           | 0        | 0         | 0         | MOSN3117-19  | <a href="http://www.boldsystems.org/">http://www.boldsystems.org/</a> |
| H362         | 1           | 0        | 0         | 0         | MOSN3126-19  | <a href="http://www.boldsystems.org/">http://www.boldsystems.org/</a> |
| H363         | 1           | 0        | 0         | 0         | MOSN3127-19  | <a href="http://www.boldsystems.org/">http://www.boldsystems.org/</a> |
| H364         | 1           | 0        | 0         | 0         | MOSN3136-19  | <a href="http://www.boldsystems.org/">http://www.boldsystems.org/</a> |
| H365         | 1           | 0        | 0         | 0         | MOSN3165-19  | <a href="http://www.boldsystems.org/">http://www.boldsystems.org/</a> |
| H366         | 1           | 0        | 0         | 0         | MOSN3182-19  | <a href="http://www.boldsystems.org/">http://www.boldsystems.org/</a> |
| H367         | 1           | 0        | 0         | 0         | MOSN3228-19  | <a href="http://www.boldsystems.org/">http://www.boldsystems.org/</a> |
| H368         | 1           | 0        | 0         | 0         | MOSN3318-19  | <a href="http://www.boldsystems.org/">http://www.boldsystems.org/</a> |
| H369         | 1           | 0        | 0         | 0         | MOSN3319-19  | <a href="http://www.boldsystems.org/">http://www.boldsystems.org/</a> |
| H370         | 1           | 0        | 0         | 0         | MOSN3321-19  | <a href="http://www.boldsystems.org/">http://www.boldsystems.org/</a> |
| H371         | 1           | 0        | 0         | 0         | MOSN3381-19  | <a href="http://www.boldsystems.org/">http://www.boldsystems.org/</a> |
| H372         | 1           | 0        | 0         | 0         | MOSN3402-19  | <a href="http://www.boldsystems.org/">http://www.boldsystems.org/</a> |
| H373         | 1           | 0        | 0         | 0         | MOSN3403-19  | <a href="http://www.boldsystems.org/">http://www.boldsystems.org/</a> |
| H374         | 1           | 0        | 0         | 0         | MOSN3490-19  | <a href="http://www.boldsystems.org/">http://www.boldsystems.org/</a> |
| H375         | 1           | 0        | 0         | 0         | MOSN3499-19  | <a href="http://www.boldsystems.org/">http://www.boldsystems.org/</a> |
| H376         | 1           | 0        | 0         | 0         | MOSN3523-19  | <a href="http://www.boldsystems.org/">http://www.boldsystems.org/</a> |
| H377         | 1           | 0        | 0         | 0         | MOSN360-18   | <a href="http://www.boldsystems.org/">http://www.boldsystems.org/</a> |
| H378         | 1           | 0        | 0         | 0         | MOSN436-18   | <a href="http://www.boldsystems.org/">http://www.boldsystems.org/</a> |
| H379         | 1           | 0        | 0         | 0         | MOSN491-18   | <a href="http://www.boldsystems.org/">http://www.boldsystems.org/</a> |
| H380         | 1           | 0        | 0         | 0         | MOSN503-18   | <a href="http://www.boldsystems.org/">http://www.boldsystems.org/</a> |
| H381         | 1           | 0        | 0         | 0         | MOSN848-18   | <a href="http://www.boldsystems.org/">http://www.boldsystems.org/</a> |
| H382         | 1           | 0        | 0         | 0         | MOSN852-18   | <a href="http://www.boldsystems.org/">http://www.boldsystems.org/</a> |
| H383         | 1           | 0        | 0         | 0         | MOSN853-18   | <a href="http://www.boldsystems.org/">http://www.boldsystems.org/</a> |
| H384         | 1           | 0        | 0         | 0         | MOSN858-18   | <a href="http://www.boldsystems.org/">http://www.boldsystems.org/</a> |
| H385         | 1           | 0        | 0         | 0         | MOSN968-18   | <a href="http://www.boldsystems.org/">http://www.boldsystems.org/</a> |
| H386         | 1           | 0        | 0         | 0         | MOSN972-18   | <a href="http://www.boldsystems.org/">http://www.boldsystems.org/</a> |
| H387         | 1           | 0        | 0         | 0         | MOSN976-18   | <a href="http://www.boldsystems.org/">http://www.boldsystems.org/</a> |
| H388         | 1           | 0        | 0         | 0         | MOSN991-18   | <a href="http://www.boldsystems.org/">http://www.boldsystems.org/</a> |
| H389         | 1           | 0        | 0         | 0         | NEONT275-10  | [53]                                                                  |
| H390         | 1           | 0        | 0         | 0         | NEONU128-11  | <a href="http://www.boldsystems.org/">http://www.boldsystems.org/</a> |
| H391         | 1           | 0        | 0         | 0         | NEONU130-11  | <a href="http://www.boldsystems.org/">http://www.boldsystems.org/</a> |
| H392         | 1           | 0        | 0         | 0         | NEONU309-11  | <a href="http://www.boldsystems.org/">http://www.boldsystems.org/</a> |
| H393         | 1           | 0        | 0         | 0         | TDWGB127-10  | <a href="http://www.boldsystems.org/">http://www.boldsystems.org/</a> |
| H394         | 1           | 0        | 0         | 0         | TDWGB705-10  | <a href="http://www.boldsystems.org/">http://www.boldsystems.org/</a> |
| H395         | 1           | 0        | 0         | 0         | USDIQ1433-10 | <a href="http://www.boldsystems.org/">http://www.boldsystems.org/</a> |
| <b>Total</b> | <b>1049</b> | <b>2</b> | <b>46</b> | <b>87</b> | <b>1184</b>  |                                                                       |

156 **Figure 1.** Locations where genetic material was extracted for the *A. vexans*  
 157 populations analyzed (2A), as well as phylogenetic relations among populations, as arrows  
 158 observed in the haplotype network (2B). In both figures the colors below denote the  
 159 continents and their respective countries. ● America + Europe: Canada, United States and  
 160 Turkey. ● Asia: China, India, Japan, Singapore and South Korea. ● Europe + Asia: Sweden,  
 161 Belgium and China. ● Europe + Asia: Romania, Sweden, Belgium, Russia, Kosovo, the  
 162 Netherlands, China, Spain, Germany, Iran, Austria and Hungary. ● Africa: South Africa. ●  
 163 America + Africa: South Africa and the United States.

164 Table 2 shows, by continent and countries, the results of  $Hd$ ,  $\pi$  and the different  
 165 neutrality tests. In general, the global  $Hd$  was 0.92, while by continents it varied between 0.90  
 166 (Europe) and 1.0 (Africa). The  $Hd$  by countries was between 0.0 (Austria, Turkey, Hungary,  
 167 Singapore, and India) and 1.0 (Germany, Kosovo, Rumania, Russia, South Korea, and South  
 168 Africa). In turn, the global  $\pi$  was 0.01, while by continents it varied between 0.005 (Europe)  
 169 and 0.08 (Africa). The  $\pi$  among countries ranged between 0.0 (Austria, Hungary, Turkey,  
 170 Singapore, and India) and 0.08 (South Africa). Neutrality tests, Tajima's D, and Fu's F, at  
 171 global level, were negatively significant ( $D = -2.20$ ,  $p < 0.001$ ;  $F = -5.22$ ,  $p < 0.02$ ); by  
 172 continent and countries, America ( $D = -2.46$ ,  $p < 0.05$ ;  $F = -5.65$ ,  $p < 0.02$ ) and all its countries  
 173 (Canada  $D = -2.43$ ,  $p < 0.05$ ;  $F = -5.13$ ,  $p < 0.02$  and USA  $D = -2.30$ ,  $p < 0.05$ ;  $F = -4.96$ ,  $p <$   
 174  $0.02$ ) were statistically significant and with negative values.

**Table 2.** Results of genetic diversity and neutrality tests at global level and by countries for *A. vexans*.

| Contine<br>nt | Countri<br>es | Number of<br>sequences | Genetic diversity       |      |       | Neutrality tests |            |
|---------------|---------------|------------------------|-------------------------|------|-------|------------------|------------|
|               |               |                        | Number of<br>haplotypes | $Hd$ | $\pi$ | Tajimas'<br>D    | Fus's<br>F |

|                |              |      |     |         |        |             |           |
|----------------|--------------|------|-----|---------|--------|-------------|-----------|
| <b>America</b> |              | 1049 |     | 0.97391 | 0.0299 |             |           |
|                |              |      | 325 | 3       | 4      | -2.463612*  | -5.65202* |
|                | Canada       | 759  | 191 | 0.90113 | 0.0051 | -2.435669*  | -5.13490* |
|                |              |      |     |         | 8      |             |           |
|                | USA          | 290  | 134 | 0.93120 | 0.0108 | -2.306334*  | -4.96645* |
|                |              |      |     |         | 8      |             |           |
| <b>Africa</b>  |              | 2    |     | 1.0000  | 0.0851 | N/A         | N/A       |
|                |              |      | 2   |         | 1      |             |           |
|                | South Africa | 2    | 2   | 1.0000  | 0.0851 | N/A         | N/A       |
|                |              |      |     |         | 1      |             |           |
| <b>Asia</b>    |              | 46   |     | 0.91259 | 0.0213 | 0.7167907   | -0.55008  |
|                |              |      | 29  |         | 5      |             |           |
|                | China        | 13   | 9   | 0.98717 | 0.0251 | -0.07488041 | -0.51062  |
|                |              |      |     |         | 5      |             |           |
|                | South Korea  | 3    | 3   | 1.0000  | 0.0117 | N/A         | N/A       |
|                |              |      |     |         | 6      |             |           |
|                | Iran         | 7    | 3   | 0.80952 | 0.0040 | 0.4024933   | 0.4229    |
|                |              |      |     |         | 5      |             |           |
|                | India        | 2    | 1   | 0       | 0      | N/A         | N/A       |
|                | Japan        | 13   | 8   | 0.94871 | 0.0148 | -0.3390129  | -0.52121  |
|                |              |      |     |         | 1      |             |           |
|                | Russia       | 5    | 4   | 1.0000  | 0.0058 | 0.2734498   | 0.27834   |
|                |              |      |     |         | 8      |             |           |
|                | Singapore    | 3    | 1   | 0       | 0      | N/A         | N/A       |
| <b>Europe</b>  |              | 85   |     | 0.90983 | 0.0059 | -0.2722376  | -1.65434  |
|                |              |      | 39  |         | 8      |             |           |
|                | Germany      | 2    | 2   | 1.0000  | 0.0029 | N/A         | N/A       |
|                |              |      |     |         | 4      |             |           |
|                | Austria      | 2    | 1   | 0       | 0      | N/A         | N/A       |
|                | Belgium      | 16   | 8   | 0.89166 | 0.0145 | -1.16233    | -0.48408  |
|                |              |      |     |         | 5      |             |           |
|                | Spain        | 15   | 7   | 0.88571 | 0.0057 | -1.619073   | -2.29068  |
|                |              |      |     |         | 7      |             |           |
|                | Hungary      | 2    | 1   | 0.0000  | 0      | N/A         | N/A       |
|                | Kosovo       | 2    |     | 1.0000  | 0.0029 | N/A         | N/A       |
|                |              |      | 2   |         | 4      |             |           |

|              |      |     |         |             |            |           |
|--------------|------|-----|---------|-------------|------------|-----------|
| Netherlands  | 10   | 4   | 0.71111 | 0.0032<br>0 | 0.0964613  | 0.17394   |
| Rumania      | 2    | 1   | 1.0000  | 0.0117<br>6 | N/A        | N/A       |
| Sweden       | 34   | 12  | 0.95365 | 0.0275<br>9 | 1.301434   | 0.12606   |
| Turkey       | 2    | 1   | 0       | 0           | N/A        | N/A       |
| <b>Total</b> | 1182 | 395 | 0.92853 | 0.0109<br>9 | -2.208676* | -5.22367* |

*Hd* = Haplotype diversity;  $\pi$  = Nucleotide diversity; N/A = Not available; \* =  $p < 0.05$ .

175 In Table 3, the AMOVA indicated the existence of genetic structuring at continent and  
 176 country levels and within countries ( $F_{ST} = 0.08$ ,  $p < 0.05$ ), where the highest variation  
 177 percentage was observed among *A. vexans* individuals within countries (91.30%), followed by  
 178 7.07% among continents and 1.62% among countries in the same continent. In Figure 2,  
 179 Mantel's test indicated no isolation by distance ( $r = 0.003$ ,  $p > 0.05$ ).

**Table 3.** Analysis of molecular variance (AMOVA) of populations of *A. vexans* at continental level, by countries, and within them.

| Variation source                    | d.f. | Sum of Squares | Variation components | Variation percentage | $F_{st}$ | $p$ - value <sup>a</sup> |
|-------------------------------------|------|----------------|----------------------|----------------------|----------|--------------------------|
| Between continents                  | 3    | 10.820         | 0.03508 Va           | 7.07                 | 0.08697  | 0.00196                  |
| Between countries within continents | 16   | 11.450         | 0.00804 Vb           | 1.62                 |          |                          |
| Within countries                    | 1164 | 526.956        | 0.45271 Vc           | 91.30                |          | 0.04059+-                |
| <b>Total</b>                        | 1183 | 549.226        | 0.49584              |                      |          |                          |

<sup>a</sup>Value obtained from 10000 random permutations

180 **Figure 2.** Global Mantel’s correlation test for genetic and geographic distance of the  
 181 *A. vexans* populations analyzed.

182 Table 4 shows peer-to-peer comparisons among countries after Bonferroni’s  
 183 correction. For these, significant genetic structuring was detected within Canada with respect  
 184 to Belgium, Sweden, Spain, Hungary, and Netherlands. The USA with respect to Austria,  
 185 Belgium, Sweden, Spain, Hungary, and Netherlands. China with respect to Netherlands, the  
 186 USA, and Canada. India with respect to the USA and Canada. Iran with respect to the USA  
 187 and Canada. Japan with respect to Belgium, Sweden, Spain, and Netherlands. Russia with  
 188 respect to the USA and Canada. Singapore with respect to Belgium, Sweden, and Spain.

**Table 4.** Values by countries of genetic differentiation by peers ( $F_{ST}$ ) and geographic distance (Km) among *A. vexans* populations. Values in bold are genetically structured populations.

|                | Au   | Bel | Tu  | Sw  | Sp  | Ru  | Neth  | Ko  | Hu  | Ger | Ca  | The    | Chi | Indi | Iran | Jap | Ru  | Sin  | Sout  | Sout |
|----------------|------|-----|-----|-----|-----|-----|-------|-----|-----|-----|-----|--------|-----|------|------|-----|-----|------|-------|------|
|                | stri | giu | rke | ede | Sp  | ma  | erlan | sov | nga | ma  | na  | United | na  | a    | Iran | an  | ssi | gap  | h     | h    |
|                | a    | m   | y   | n   | ain | nia | ds    | o   | ry  | ny  | da  | States | na  | a    |      | a   | a   | Kore | Afric |      |
|                |      |     |     |     |     |     |       |     |     |     |     |        |     |      |      |     |     |      |       |      |
| <b>Austria</b> | 0    | 80  | 19  | 14  | 16  | 813 | 839.  | 74  | 375 | 503 | 72  | 8353.2 | 714 | 643  | 368  | 916 | 15  | 985  | 8624  | 8731 |
|                |      | 6.8 | 20. | 28. | 56. | .21 | 29    | 0.2 | .66 | .23 | 60. | 8      | 5.3 | 7.5  | 5.8  | 6.6 | 80. | 2.86 | .48   | .87  |
|                |      | 1   | 67  | 80  | 86  |     | 7     |     |     |     | 85  |        | 8   | 3    | 4    | 2   | 06  |      |       |      |
| <b>Belgium</b> | 0.1  |     | 27  | 13  | 12  | 159 |       | 15  | 116 |     | 65  |        | 763 | 717  | 446  | 937 | 12  | 105  |       |      |
|                |      | 0   | 24. | 91. | 86. | 6.5 | 190.  | 29. | 0.2 | 426 | 69. | 7562.3 | 5.7 | 9.4  | 8.5  | 5.4 | 82. | 62.1 | 8930  | 9205 |
|                | 6    |     | 38  | 91  | 86  | 6   | 10    | 55  | 7   |     | 97  | 6      | 3   | 4    | 1    | 2   | 1   | 5    | .74   | .65  |
| <b>Turkey</b>  | 1.0  | 0.2 |     | 26  | 33  | 114 |       | 12  | 156 | 235 | 88  |        | 595 | 463  | 181  | 853 | 30  | 808  | 7798  | 7843 |
|                | 0    | 9   | 0   | 26. | 15. | 5.4 | 2727  | 72. | 7.4 | 7.3 | 47. | 10193. | 6.5 | 6.3  | 4.9  | 7.2 | 26. | 3.65 | .83   | .71  |
|                |      |     |     | 41  | 95  | 7   | .37   | 91  | 2   | 5   | 73  | 06     | 4   | 6    | 4    | 6   | 34  |      |       |      |
| <b>Sweden</b>  | 0.1  | 0.0 | 0.2 |     | 26  | 163 |       | 19  | 144 | 112 | 62  |        | 638 | 641  | 400  | 798 | 46  | 962  | 7557  | 1010 |
|                |      |     |     | 0   | 78. | 3.0 | 1211  | 56. | 4.4 | 0.6 | 21. | 7676.0 | 5.7 | 1.6  | 5.7  | 4.0 | 6.4 | 0.94 | .36   | 2.98 |
|                | 8    | 1   | 3   |     | 56  | 1   | .49   | 96  | 2   | 6   | 33  | 5      | 1   | 8    | 8    | 5   | 2   |      |       |      |
| <b>Spain</b>   | 0.2  | -   |     |     | 239 |     |       | 20  | 200 | 161 | 70  |        | 879 | 795  | 512  | 106 | 25  | 113  | 1019  | 8371 |
|                | 0    | 0.0 | 0.2 | 0.0 | 0   | 4.3 | 1470  | 60. | 1.7 | 7.1 | 67. | 7597.4 | 8.1 | 0.5  | 9.7  | 60. | 35. | 96.1 | 6.42  | .54  |
|                |      |     | 9   | 1   |     | .75 |       | 65  | 2   | 9   | 6   | 2      | 1   | 5    | 5    | 56  | 95  | 4    |       |      |

|                   |            |            |     |            |            |     |             |     |            |     |            |             |     |     |     |     |      |      |      |      |
|-------------------|------------|------------|-----|------------|------------|-----|-------------|-----|------------|-----|------------|-------------|-----|-----|-----|-----|------|------|------|------|
| Rumania           | 0.5        | 0.0        | 0.5 | 0.0        | 0.0        | 0   | 1585        | 49  | 121        | 78  | 9055.9     | 648         | 562 | 287 | 871 | 19  | 904  | 8097 | 8518 |      |
|                   | 0          | 8          | 0   | 2          | 8          |     | .82         | 3.0 | 439        | 4.3 | 00.        | 3.4         | 7.0 | 5.3 | 7.0 | 67. | 9.68 | .49  | .7   |      |
|                   |            |            |     |            |            |     |             | 2   | 3          | 24  | 9          | 9           | 5   | 2   | 8   | 74  |      |      |      |      |
| Netherlands       | 0.2        | -          | 0.4 | 0.0        | -          | 0.2 | 0           | 15  | 116        | 64  | 7514.4     | 749         | 711 | 443 | 919 | 10  | 104  | 8760 | 9364 |      |
|                   | 2          | 0.0        | 3   | 6          | 0.0        | 1   | 0           | 78. | 1.4        | 60. | 9          | 4.7         | 8.4 | 9.9 | 5.3 | 92. | 80.8 | .3   | .94  |      |
|                   |            | 2          |     |            | 1          |     |             | 53  | 4          | 97  |            | 9           | 1   | 2   | 5   | 23  | 1    |      |      |      |
| Kosovo            | 0.0        | -          | 0.5 | -          | 0.0        | 0.0 | 0.07        | 0   | 123        | 79  | 9089.5     | 692         | 589 | 308 | 920 | 22  | 933  | 8577 | 8147 |      |
|                   | 0          | 0.0        | 0   | 0.0        | 0.0        | 0.0 | 0           | 519 | 8.8        | 83. | 9          | 5.2         | 3.5 | 4.7 | 6.7 | 16. | 6.84 | .55  | .03  |      |
|                   |            | 1          |     | 1          |            |     |             |     | 9          | 27  |            |             | 5   | 4   | 8   | 33  |      |      |      |      |
| Hungary           | 0.0        | 0.1        | 1.0 | 0.1        | 0.2        | 0.5 | 0.22        | 0.0 | 74         | 794 | 8661.7     | 682         | 606 | 331 | 893 | 16  | 947  | 8357 | 8658 |      |
|                   | 0          | 6          | 0   | 8          | 0          | 0   | 0           | 0   | 84.        | 56  | 5          | 1.4         | 1.8 | 4.8 | 4.0 | 97. | 8.4  | .86  | .83  |      |
|                   |            |            |     |            |            |     |             |     | 73         |     |            | 7           | 7   | 5   | 7   |     |      |      |      |      |
| Germany           | 0.5        | 0.0        | 0.5 | 0.0        | 0.0        | 0.0 | 0.21        | 0.0 | 67         | 58. | 7870.2     | 723         | 675 | 406 | 905 | 11  | 101  | 8579 | 9179 |      |
|                   | 0          | 8          | 0   | 3          | 8          | 0   | 0           | 0   | 0          | 28  | 8          | 1.9         | 9.7 | 8.9 | 8.5 | 53. | 36.4 | .29  | .84  |      |
|                   |            |            |     |            |            |     |             |     |            |     |            | 8           | 5   | 8   | 5   | 09  | 5    |      |      |      |
| Canada            | 0.2        | <b>0.1</b> | 0.2 | <b>0.0</b> | <b>0.1</b> | 0.0 | <b>0.17</b> | 0.0 | <b>0.2</b> | 0.0 | 2264.0     | 939         | 114 | 999 | 809 | 58  | 130  | 8588 | 1520 |      |
|                   | 6          | <b>0</b>   | 3   | <b>7</b>   | <b>0</b>   | 7   | <b>0.17</b> | 7   | <b>6</b>   | 7   | 7          | 6.3         | 81. | 8.9 | 1.7 | 36. | 82.5 | .54  | 1.01 |      |
|                   |            |            |     |            |            |     |             |     |            |     |            | 7           | 96  | 1   | 7   | 54  | 8    |      |      |      |
| The United States | <b>0.2</b> | <b>0.0</b> | 0.2 | <b>0.0</b> | <b>0.0</b> | 0.0 | <b>0.15</b> | 0.0 | <b>0.2</b> | 0.0 | 0          | 116         | 135 | 116 | 101 | 72  | 153  | 1075 | 1441 |      |
|                   | <b>4</b>   | <b>8</b>   | 3   | <b>5</b>   | <b>8</b>   | 5   | <b>0.15</b> | 5   | <b>4</b>   | 5   | 0          | 60.         | 91. | 70. | 61. | 28. | 07.0 | 4.68 | 4.9  |      |
|                   |            |            |     |            |            |     |             |     |            |     |            | 31          | 88  | 95  | 81  | 03  | 3    |      |      |      |
| China             | 0.2        | 0.0        | 0.2 | 0.0        | 0.0        | 0.0 | <b>0.14</b> | 0.0 | 0.2        | 0.0 | <b>0.0</b> |             | 298 | 461 | 305 | 67  | 384  | 2120 | 1124 |      |
|                   | 3          | 6          | 3   | 3          | 6          | 0   | <b>0.14</b> | 0   | 3          | 0   | <b>6</b>   | <b>0.04</b> | 0   | 7.1 | 7.4 | 0.1 | 50.  | 1.78 | .74  | 9.63 |
|                   |            |            |     |            |            |     |             |     |            |     |            |             | 4   | 8   | 7   | 64  |      |      |      |      |
| India             | 10.        | 0.2        | 1.0 | 0.2        | 0.2        | 0.5 | 0.43        | 0.5 | 1.0        | 0.5 | <b>0.2</b> | 0.1         | 283 | 596 | 68  | 344 | 5022 | 8264 |      |      |
|                   | 00         | 9          | 0   | 3          | 9          | 0   | 0.43        | 0   | 0          | 0   | <b>6</b>   | <b>0.25</b> | 0   | 0.9 | 5.9 | 74. | 7.51 | .33  | .28  |      |
|                   |            |            |     |            |            |     |             |     |            |     |            |             | 2   | 8   | 4   |     |      |      |      |      |
| Iran              | 0.3        | 0.0        | 0.3 | 0.0        | 0.1        | 0.1 | 0.18        | 0.1 | 0.3        | 0.1 | <b>0.1</b> | 0.0         | 0.3 |     | 752 | 44  | 627  | 6664 | 7724 |      |
|                   | 8          | 8          | 8   | 8          | 0          | 3   | 0.18        | 3   | 8          | 3   | <b>3</b>   | <b>0.11</b> | 9   | 8   | 0   | 3.9 | 63.  | 7.06 | .19  | .52  |
|                   |            |            |     |            |            |     |             |     |            |     |            |             |     |     | 4   | 71  |      |      |      |      |
| Japan             | 0.2        | <b>0.0</b> | 0.2 | <b>0.0</b> | <b>0.0</b> | 0.0 | <b>0.16</b> | 0.0 | 0.2        | 0.0 | 0.0        | 0.06        | 0.0 | 0.2 | 0.1 |     | 81   | 525  | 943. | 1410 |
|                   | 6          | <b>8</b>   | 6   | <b>4</b>   | <b>8</b>   | 3   | <b>0.16</b> | 3   | 6          | 3   | 7          | 0.06        | 3   | 6   | 1   | 0   | 83.  | 5.67 | 81   | 2.62 |
|                   |            |            |     |            |            |     |             |     |            |     |            |             |     |     |     | 22  |      |      |      |      |
| Russia            | 0.1        | -          | 0.2 | -          | -          | 0.0 | 0.00        | -   | 0.1        | 0.0 | <b>0.0</b> | 0.0         | 0.2 | 0.0 | 0.0 |     | 100  | 7814 | 1031 |      |
|                   | 3          | 0.0        | 8   | 0.0        | 0.0        | 0   | 0.00        | 0.1 | 3          | 0   | <b>6</b>   | <b>0.04</b> | 0   | 8   | 1   | 2   | 0    | 60.8 | .24  | 1.88 |
|                   |            | 5          |     | 2          | 3          |     |             | 1   |            |     |            |             |     |     |     |     | 3    |      |      |      |

|              |     |     |     |     |     |     |      |     |     |     |     |      |     |     |     |     |     |      |      |      |
|--------------|-----|-----|-----|-----|-----|-----|------|-----|-----|-----|-----|------|-----|-----|-----|-----|-----|------|------|------|
| Singapore    | 1.0 | 0.3 | 1.0 | 0.2 | 0.3 | 0.6 |      | 0.6 | 1.0 | 0.6 | 0.3 |      | 0.2 | 0.0 | 0.4 | 0.3 | 0.3 |      | 4572 | 9223 |
|              | 0   | 5   | 0   | 9   | 5   | 4   | 0.48 | 4   | 0   | 4   | 0   | 0.29 | 5   | 0   | 5   | 2   | 8   | 0    | .22  | .14  |
| South Korea  | 0.3 | 0.0 | 0.3 | 0.0 | 0.0 | 0.0 |      | 0.0 | 0.3 | 0.0 | 0.0 |      | 0.0 | 0.3 | 0.1 | 0.0 | 0.0 |      |      | 1318 |
|              | 6   | 7   | 6   | 3   | 7   | 0   | 0.19 | 0   | 6   | 0   | 6   | 0.04 | 0   | 6   | 1   | 3   | 0   | 0.50 | 0    | 8    |
| South Africa | 0.5 | 0.0 | 0.5 | 0.0 | 0.0 | 0.0 |      | 0.0 | 0.5 | 0.0 | 0.0 |      | 0.0 | 0.5 | 0.1 | 0.0 | 0.0 |      |      |      |
|              | 0   | 8   | 0   | 3   | 8   | 0   | 0.21 | 0   | 0   | 0   | 7   | 0.05 | 0   | 0   | 3   | 3   | 0   | 0.64 | 0.00 | 0    |

189

190 Figure 3 shows the results of the phylogenetic analyses by using BI (Fig. 3A) and ML  
 191 (Fig. 3B); both analyses recovered the same six clades, but with distinct topologies: clade I  
 192 grouped mosquito populations from the United States, Canada, and Turkey (n = 322 H); clade  
 193 II, populations from China, Japan, Singapore, and South Korea (n = 23); clade III, populations  
 194 from Sweden, Belgium, and China (n = 14 H); clade IV, mosquito populations from Rumania,  
 195 Sweden, Belgium, Russia, Kosovo, Netherlands, China, Spain, Germany, Iran, Austria, and  
 196 Hungary (n = 31 H); clade V, populations from South Africa (n = 1 H); and clade VI,  
 197 populations from the United States and South Africa (n = 4 H). Similar results were observed  
 198 in the haplotype network (Figure 1B).

199 **Figure 3.** Phylogenetic tree for *Aedes vexans* populations constructed from 395  
 200 haplotypes from the COI gene by using Bayesian Inference, BI, (3A) and Maximum  
 201 Likelihood, ML, (3B). The evolutionary history for both analyses was inferred by using the  
 202 GTR + G model, as suggested by jModelTest version 2.1.10. The BI tree was obtained by  
 203 using 2-million generations, while the ML used 1,000 replicas. For BI, the support of the  
 204 branches is indicated by the subsequent probability values, while for ML the bootstrap values  
 205 are shown. Numbers in blue represent sequences from the *A. nipponii* subspecies. In both  
 206 figures the colors below denote the continents and their respective countries. ● America +  
 207 Europe: Canada, United States and Turkey. ● Asia: China, India, Japan, Singapore and South

208 Korea. ● Europe + Asia: Sweden, Belgium and China. ● Europe + Asia: Romania, Sweden,  
209 Belgium, Russia, Kosovo, the Netherlands, China, Spain, Germany, Iran, Austria and  
210 Hungary. ● Africa: South Africa. ● America + Africa: South Africa and the United States.

211

212



## 213 Discussion

214 To our knowledge, this is the first study on the genetic structure of *A. vexans* using all the  
215 genetic information available for the COI gene from the GenBank and Boldsystem databases.  
216 From this information, both the haplotype network and the phylogenetic tree revealed the  
217 existence of six clades; clade I grouped mosquito populations from America and Europe;  
218 clade II, populations from Asia; clades III and IV, populations from Europe and Asia; clade  
219 V, populations from Africa; and clade VI, populations from America and Africa. For *A.*  
220 *vexans*, existence is suggested of three subspecies: *A. vexans vexans*, *A. vexans arabiensis*,  
221 and *A. vexans nipponii*, from which it was possible to include in our natural population  
222 analyses of *A. vexans* and *A. vexans nipponii*. *A. vexans vexans* has been reported for east  
223 Asia and Oceania, *A. vexans arabiensis* in Africa and Europe, and *A. vexans nipponii* in  
224 southeast Asia [1,14,2,42,15,16,17]. However, our results do not suggest the existence of  
225 three subspecies or the geographic relations observed. Nonetheless, it is interesting that with  
226 *A. vexans* being considered native of America [13] its invasion is not hypothesized to other  
227 latitudes, a pattern observed even with *A. vexans nipponii* terminals registered in Asia, as  
228 suggested by our results. This is why the subspecies observed in countries different from  
229 America would probably be populations from their place of origin through passive transport  
230 (*i.e.*, maritime, air, or land transport), as already observed for other Culicidae invaders  
231 [54,55,56,57,58], including *A. vexans* [59]. Future studies should include information at  
232 genome level to try to solve the possible existence of subspecies, given that using a single  
233 marker is not sufficient to define the species [60], as was observed even for this species by  
234 using the COI gene [48].

235 Haplotype diversity and number of haplotypes observed in the American continent  
236 ( $Hd = 0.97$ ;  $H = 325$ ) were higher than in other continents; for example, Europe ( $Hd = 0.90$ ;  $H$   
237  $= 39$ ). Various studies suggest that native species have higher genetic diversity when

238 compared with places different from their native area [61,62,63]. For example, a global study  
239 on the Cosmopolitan Asian mosquito, *Aedes albopictus*, principal dengue, Zika and  
240 Chikungunya vector in Asia and Europe, observed greater genetic diversity ( $Hd = 0.94$ ,  $\pi =$   
241 1.60) in its native area with respect to all the areas it has invaded, showing – therein – lower  
242 diversity indices (lower  $Hd$  in Netherlands ( $0.059 = \pi = 0.011$ ) and higher  $Hd$  in China ( $0.946$   
243  $= \pi = 1.609$ )) [63]. The aforementioned supports our hypothesis that *A. vexans* populations  
244 may have invaded other latitudes.

245 The *A. vexans* mosquito showed significant genetic divergence among some populations from  
246 the American continent with respect to some European and Asian populations (Table 4). [64],  
247 analyzing natural *A. vexans* populations from the United States and Germany, found that these  
248 do not share a common gene pool, proposing that the geographic barriers formed by the  
249 Atlantic and Pacific Oceans impede gene flow and cause genetic changes in the evolutionary  
250 lineages of *A. vexans*. However, our results suggest no existence of geographic and genetic  
251 isolation. Additionally, for most of the populations, the results of the neutrality tests, Tajima's  
252  $D$  and Fu's  $FS$  were negative (Table 2), suggesting that these have experienced recent  
253 bottlenecks and population expansion [65]. This may be due to recent vector-control actions  
254 and colonization events, phenomena commonly observed in mosquitos of medical and  
255 veterinary importance [66]. In the first case, these are used to diminish the population size of  
256 *A. vexans* and other vector species of diseases and, consequently, curtail the epidemiologic  
257 transmission of the diseases it transmits [67,68,69]. In the second case, recent colonization  
258 events may take place in areas from where the *A. vexans* populations are lost during harsh  
259 winters or after vector-control actions and can be re-colonized by surviving individuals from  
260 neighboring areas [3,70,58].

261 **Conclusions**

262 Finally, our results suggest that the *A. vexans* populations that invaded other continents  
263 originate directly from America, where possibly transcontinental commercial routes favored  
264 their long-distance dispersion. Moreover, we consider this study as the base for future  
265 taxonomic research that address the problem of the existence of subspecies within *A. vexans*,  
266 given that our results did not recover any of the subspecies suggested by the literature.

267 **Acknowledgments**

268 The authors thank the Vice-rectory of Research at Universidad del Quindío for the funding  
269 needed to translate the manuscript.

270 **Ethical considerations**

271 This work did not experiment with humans or other living beings; its data were obtained from

272 genetic databases freely available on line.

273 **Conflicts of interest**

274 The authors have no conflict of interest to declare.

275

276 **References**

- 277 Reinert JF. Contributions to the mosquito fauna of Southeast Asia. XVI. Genus  
278 *Aedes* Meigen, subgenus *Aedimorphus* Theobald in Southeast Asia. Contrib  
279 AmEntomol Inst 9:66– 66;1973
- 280 2. Johansen CA, Lindsay MDA, Harrington SA, Whelan PI, Russell RC, Broom  
281 AK. First Record of *Aedes* (*Aedimorphus*) *Vexans Vexans* (Meigen) in  
282 Australia. J Am Mosq Control Assoc. 2005;21(2):222–4.
- 283 3. Szalanski AL, Owens CB, Lewter JA, Broce AB. Genetic Structure of *Aedes*  
284 *vexans* (Diptera: Culicidae) Populations from Central United States Based on  
285 Mitochondrial ND5 Sequences. Ann Entomol Soc Am. 2006;99(1):157–63.
- 286 4. Briegel H, Waltert A, Kuhn R. Reproductive Physiology of *Aedes* (  
287 *Aedimorphus* ) *vexans* (Diptera: Culicidae) in Relation to Flight Potential . J  
288 Med Entomol. 2001;38(4):557–65.
- 289 5. Eritja R, Palmer JRB, Roiz D, Sanpera-Calbet I, Bartumeus F. Direct Evidence  
290 of Adult *Aedes albopictus* Dispersal by Car. Sci Rep. 2017;7(1):1–15.
- 291 6. Schaffner S, Medlock JM, Bortel W Van. Public health significance of  
292 invasive mosquitoes in Europe. Clin Microbiol Infect [Internet].  
293 2013;19(8):685–92.
- 294 7. Strickman D. Stimuli Affecting Selection of Oviposition Sites by *Aedes*  
295 *Vexans* (Diptera: Culicidae): Light1. J Med Entomol. 1982;19(2):181–4.
- 296 8. Rey JR, Lounibos P. Ecología de *Aedes aegypti* y *Aedes albopictus* en América  
297 y transmisión enfermedades. Biomedica. 2015;35(2):177–85.
- 298 9. Edman JD. Host-feeding patterns of Florida mosquitoes. I. *Aedes*, *Anopheles*,  
299 *Coquillettidia*, *Mansonia* and *Psorophora*. J Med Entomol. 1971;8(6):687–95.

- 300 10. Brust RA. dispersal behavior of adult aedes sticticus and *Aedes vexans*  
301 (diptera: culicidae) in manitoba. can entomol. 1980;112(01):31–42.
- 302 11. Nasci RS. Variations in the blood-feeding patterns of *Aedes vexans* and *Aedes*  
303 trivittatus (Diptera: Culicidae). J Med Entomol. 1984;21(1):95–9.
- 304 12. Thompson PH, Dicke RJ. Sampling studies with *Aedes vexans* and some other  
305 Wisconsin Aedes (Diptera: Culicidae). Ann Entomol Soc Am. 1965;58(6):927–  
306 30.
- 307 13. O’Donnell KL, Bixby MA, Morin KJ, Bradley DS, Vaughan JA. Potential of a  
308 northern population of *Aedes vexans* (Diptera: Culicidae) to transmit Zika  
309 virus. J Med Entomol. 2017;54(5):1354–9.
- 310 14. Reinert JF, Harbach RE, Kitching IJ. Phylogeny and classification of *Aedini*  
311 (Diptera: Culicidae), based on morphological characters of all life stages. Zool  
312 J Linn Soc. 2004;142(3):289–368.
- 313 15. Fall AG, Diaïté A, Etter E, Bouyer J, Ndiaye TD, Konaté L. The mosquito  
314 *Aedes* (*Aedimorphus*) *vexans arabiensis* as a probable vector bridging the  
315 West Nile virus between birds and horses in Barkedji (Ferlo, Senegal). Med  
316 Vet Entomol. 2012;26(1):106–11.
- 317 16. Francuski L, Milankov V, Ludoški J, Krtinić B, Lundström JO, Kemenesi G, et  
318 al. Genetic and phenotypic variation in central and northern European  
319 populations of *Aedes* (*Aedimorphus*) *vexans* (Meigen, 1830) (Diptera,  
320 Culicidae). J Vector Ecol. 2016;41(1):160–71.
- 321 17. Sanborn MA, Klein TA, Kim HC, Fung CK, Figueroa KL, Yang Y, et al.  
322 Metagenomic analysis reveals three novel and prevalent mosquito viruses from  
323 a single pool of *Aedes vexans nipponii* collected in the republic of korea.  
324 Viruses. 2019;11(3):1–17.



- 325 18. Turell MJ, Dohm DJ, Sardelis MR, O’Guinn ML, Andreadis TG, Blow JA. An  
326 update on the potential of North American mosquitoes (Diptera: Culicidae) to  
327 transmit West Nile virus. *J Med Entomol.* 2005;42(1):57–62.
- 328 19. Ndiaye EH, Fall G, Gaye A, Bob NS, Talla C, Diagne CT, et al. Vector  
329 competence of *Aedes vexans* (Meigen), *Culex poicilipes* (Theobald) and *Cx.*  
330 *quinquefasciatus* Say from Senegal for West and East African lineages of Rift  
331 Valley fever virus. *Parasites and Vectors* [Internet]. 2016;9(1):1–9. Available  
332 from: <http://dx.doi.org/10.1186/s13071-016-1383-y>.
- 333 20. Baldacchino F, Caputo B, Chandre F, Drago A, della Torre A, Montarsi F, et  
334 al. Control methods against invasive *Aedes* mosquitoes in Europe: A review.  
335 *Pest Manag Sci.* 2015;71(11):1471–85.
- 336 21. Becker, N., & Ludwig M. Investigations on possible resistance in *Aedes*  
337 *vexans* field populations after a 10-year application of *Bacillus thuringiensis*  
338 *israelensis*. *J Am Mosq Control Assoc.* 1993;9(June):221–4.
- 339 22. Dunbar MW, Bachmann A, Varenhorst AJ. Reduced Insecticide Susceptibility  
340 in *Aedes vexans* (Diptera: Culicidae) Where Agricultural Pest Management  
341 Overlaps With Mosquito Abatement. *J Med Entomol.* 2018;55(3):747–51.
- 342 23. Endersby NM, Hoffmann AA, White VL, Lowenstein S, Ritchie S, Johnson  
343 PH, et al. Genetic Structure of *Aedes aegypti* in Australia and Vietnam  
344 Revealed by Microsatellite and Exon Primed Intron Crossing Markers  
345 Suggests Feasibility of Local Control Options . *J Med Entomol.*  
346 2009;46(5):1074–83.
- 347 24. Endersby NM, Hoffmann AA, White VL, Ritchie SA, Johnson PH, Weeks  
348 AR. Changes in the Genetic Structure of *Aedes aegypti* (Diptera: Culicidae)

- 349 Populations in Queensland, Australia, Across Two Seasons: Implications for  
350 Potential Mosquito Releases . J Med Entomol. 2011;48(5):999–1007.
- 351 25. Hoffmann AA, Montgomery BL, Popovici J, Iturbe-Ormaetxe I, Johnson PH,  
352 Muzzi F, et al. Successful establishment of Wolbachia in *Aedes* populations to  
353 suppress dengue transmission. Nature [Internet]. 2011;476(7361):454–9.  
354 Available from: <http://dx.doi.org/10.1038/nature10356>
- 355 26. Rašić G, Filipović I, Weeks AR, Hoffmann AA. Genome-wide SNPs lead to  
356 strong signals of geographic structure and relatedness patterns in the major  
357 arbovirus vector, *Aedes aegypti*. BMC Genomics. 2014;15(1):1–12.
- 358 27. Gupta A, Bhardwaj A, Supriya. Mitochondrial DNA- a Tool for Phylogenetic  
359 and Biodiversity Search in Equines. J Homeopath Ayurvedic Med.  
360 2014;s1(January).
- 361 28. Haran J, Koutroumpa F, Magnoux E, Roques A, Roux G. Ghost mtDNA  
362 haplotypes generated by fortuitous NUMTs can deeply disturb infra-specific  
363 genetic diversity and phylogeographic pattern. J Zool Syst Evol Res.  
364 2015;53(2):109–15.
- 365 29. Chamberlain S. 2017. bold: interface to Bold Systems 'API'. R package version  
366 0.4.0. Available in: <https://CRAN.R-project.org/package=bold>
- 367 30. Paradis E, Schliep K. ape 5.0: an environment for modern phylogenetics and  
368 evolutionary analyses in R. Bioinformatics 35: 526-528. Bioinformatics.  
369 2018;35(July):526–8.
- 370 31. Katoh K, Standley DM. MAFFT multiple sequence alignment software version  
371 7: Improvements in performance and usability. Mol Biol Evol.  
372 2013;30(4):772–80.

- 373 32. Paradis E. Pegas: An R package for population genetics with an integrated-  
374 modular approach. *Bioinformatics*. 2010;26(3):419–20.
- 375 33. RStudio Team. 2020. RStudio: Integrated Development for R. RStudio. PBC,  
376 Boston, MA Available en: <http://www.rstudio.com/>.
- 377 34. Rozas J, Ferrer-Mata A, Sanchez-DelBarrio JC, Guirao-Rico S, Librado P,  
378 Ramos-Onsins SE, et al. DnaSP 6: DNA sequence polymorphism analysis of  
379 large data sets. *Mol Biol Evol*. 2017;34(12):3299–302.
- 380 35. Excoffier L, Lischer HEL. Arlequin suite ver 3.5: A new series of programs to  
381 perform population genetics analyses under Linux and Windows. *Mol Ecol*  
382 *Resour*. 2010;10(3):564–7.
- 383 36. Wright S. Systems of Mating. I. the Biometric Relations Between Parent and  
384 Offspring. *Genetics*. 1921;6(3):309–309.
- 385 37. Oksanen AJ, Blanchet FG, Friendly M, Kindt R, Legendre P, Mcglinn D, et al.  
386 Package ‘vegan.’ 2017;(January).
- 387 38. Darriba D, Taboada GL, Doallo R, Posada D. JModelTest 2: More models,  
388 new heuristics and parallel computing. *Nat Methods [Internet]*. 2012;9(8):772.  
389 Available from: <http://dx.doi.org/10.1038/nmeth.2109>.
- 390 39. Stamatakis A. RAxML-VI-HPC: Maximum likelihood-based phylogenetic  
391 analyses with thousands of taxa and mixed models. *Bioinformatics*.  
392 2006;22(21):2688–90.
- 393 40. Ronquist F, Teslenko M, Van Der Mark P, Ayres DL, Darling A, Höhna S, et  
394 al. MrBayes 3.2: Efficient bayesian phylogenetic inference and model choice  
395 across a large model space. *Syst Biol*. 2012;61(3):539–42.
- 396 41. Zuccon A, Zuccon D. MrEnt: An editor for publication-quality phylogenetic  
397 tree illustrations. *Mol Ecol Resour*. 2014;14(5):1090–4.

- 398 42. Cywinska A, Hunter FF, Hebert PDN. Identifying Canadian mosquito species  
399 through DNA barcodes. *Med Vet Entomol.* 2006;20(4):413–24.
- 400 43. Hebert PDN, Ratnasingham S, Zakharov E V., Telfer AC, Levesque-Beaudin  
401 V, Milton MA, et al. Counting animal species with DNA barcodes: Canadian  
402 insects. *Philos Trans R Soc B Biol Sci.* 2016;371(1702).
- 403 44. Versteirt V, Nagy ZT, Roelants P, Denis L, Breman FC, Damiens D, et al.  
404 Identification of Belgian mosquito species (Diptera: Culicidae) by DNA  
405 barcoding. *Mol Ecol Resour.* 2015;15(2):449–57.
- 406 45. Wang G, Li C, Guo X, Xing D, Dong Y, Wang Z, et al. Identifying the Main  
407 Mosquito Species in China Based on DNA Barcoding. *PLoS One.*  
408 2012;7(10):1–11.
- 409 46. Török E, Tomazatos A, Cadar D, Horváth C, Keresztes L, Jansen S, et al. Pilot  
410 longitudinal mosquito surveillance study in the Danube Delta Biosphere  
411 Reserve and the first reports of *Anopheles algeriensis* Theobald, 1903 and  
412 *Aedes hungaricus* Mihályi, 1955 for Romania. *Parasites and Vectors* [Internet].  
413 2016;9(1):1–13. Available from: <http://dx.doi.org/10.1186/s13071-016-1484-7>
- 414 47. Ruiz-Arrondo I, McMahon BJ, Hernández-Triana LM, Santibañez P, Portillo  
415 A, Oteo JA. Surveillance of mosquitoes (Diptera, Culicidae) in a northern  
416 central region of Spain: Implications for the medical community. *Front Vet*  
417 *Sci.* 2019;6(MAR).
- 418 48. Lilja T, Troell K, Kirik H, Lindström A. A distinct group of north European  
419 *Aedes vexans* as determined by mitochondrial and nuclear markers. *Med Vet*  
420 *Entomol.* 2018;32(3):282–9.

- 421 49. Telfer AC, Young MR, Quinn J, Perez K, Sobel CN, Sones JE, et al.  
422 Biodiversity inventories in high gear: DNA barcoding facilitates a rapid biotic  
423 survey of a temperate nature reserve. *Biodivers Data J.* 2015;3(1).
- 424 50. Doosti S, Yaghoobi-Ershadi MR, Sedaghat MM, Moosa-Kazemi SH,  
425 Akbarzadeh K, Hashemi-Aghdam SS. Genetic population diversity of *Aedes*  
426 *caspius* in southern provinces of Iran. *Bull la Soc Pathol Exot.* 2018;11(1):31–  
427 7.
- 428 51. Maekawa Y, Ogawa K, Komagata O, Tsuda Y, Sawabe K. DNA barcoding for  
429 molecular identification of Japanese mosquitoes. *Med Entomol Zool.*  
430 2016;67(3):183–98.
- 431 52. Khrabrova N V., Andreeva Y V., Vaulin O V., Alekseeva SS, Sibataev AK.  
432 Variability of the mitochondrial cytochrome oxydase subunit i gene sequence  
433 in species of the genera *Aedes* and *Ochlerotatus* (Diptera: Culicidae). *Russ J*  
434 *Genet Appl Res.* 2013;3(4):279–86.
- 435 53. Hernández-Triana LM, Brugman VA, Nikolova NI, Ruiz-Arrondo I, Barrero  
436 E, Thorne L, et al. DNA barcoding of british mosquitoes (diptera, culicidae) to  
437 support species identification, discovery of cryptic genetic diversity and  
438 monitoring invasive species. *Zookeys.* 2019;2019(832):57–76.
- 439 54. Reiter P, Sprenger D. The used tire trade: a mechanism for the worldwide  
440 dispersal of container breeding mosquitoes. *J Am Mosq Control Assoc.*  
441 1987;3(3):494–501.
- 442 55. Sukehiro N, Kida N, Umezawa M, Murakami T, Arai N, Jinnai T, et al. First  
443 report on invasion of yellow fever mosquito, *Aedes aegypti*, at Narita  
444 International Airport, Japan in August 2012. *Jpn J Infect Dis.* 2013;66(3):189–  
445 94.

- 446 56. Brown JE, Evans BR, Zheng W, Obas V, Barrera-Martinez L, Egizi A, et al.  
447 Human impacts have shaped historical and recent evolution in *Aedes aegypti*,  
448 the dengue and yellow fever mosquito. *Evolution* (N Y). 2014;68(2):514–25.
- 449 57. Fonzi E, Higa Y, Bertuso AG, Futami K, Minakawa N. Human-mediated  
450 marine dispersal influences the population structure of *Aedes aegypti* in the  
451 Philippine Archipelago. *PLoS Negl Trop Dis*. 2015;9(6):1–16.
- 452 58. Díaz-Nieto LM, Chiappero MB, Díaz de Astarloa C, Maciá A, Gardenal CN,  
453 Berón CM. Genetic Evidence of Expansion by Passive Transport of *Aedes*  
454 (*Stegomyia*) *aegypti* in Eastern Argentina. *PLoS Negl Trop Dis*.  
455 2016;10(9):10–5.
- 456 59. Joyce C, Nakagawa P. *Aedes vexans nocturnus* (Theobald) in Hawaii.  
457 1963;XVIII(2):273–80.
- 458 60. Dupuis JR, Roe AD, Sperling FAH. Multi-locus species delimitation in closely  
459 related animals and fungi: One marker is not enough. *Mol Ecol*.  
460 2012;21(18):4422–36.
- 461 61. Wright AF. Genetic Variation: Polymorphisms and Mutations. *Encycl Life Sci*.  
462 2005;1–10.
- 463 62. Gloria-Soria A, Ayala D, Bheecarry A, Calderon-Arguedas O, Chadee DD,  
464 Chiappero M, et al. Global genetic diversity of *Aedes aegypti*. *Mol Ecol*.  
465 2016;25(21):5377–95.
- 466 63. Ruiling Z, Tongkai L, Dezhen M, Zhong Z. Genetic characters of the globally  
467 spread tiger mosquito, *Aedes albopictus* (Diptera, Culicidae): implications  
468 from mitochondrial gene COI. *J Vector Ecol*. 2018;43(1):89–97.
- 469 64. Krtinić B, Francuski L, Petrić D, Milankov V. Genetic diversity and  
470 differentiation between Palearctic and Nearctic populations of *Aedimorphus*

- 471 (=Aedes) *vexans* (Meigen, 1830) (Diptera, Culicidae). J Vector Ecol.  
472 2013;38(1):154–62.
- 473 65. Zawani MKN, Abu HA, Sazaly AB, Zary SY, Darlina MN. Population genetic  
474 structure of *aedes albopictus* in Penang, Malaysia. Genet Mol Res.  
475 2014;13(4):8184–96.
- 476 66. Harris AF, Rajatileka S, Ranson H. Pyrethroid resistance in *Aedes aegypti*  
477 from Grand Cayman. Am J Trop Med Hyg. 2010;83(2):277–84.
- 478 67. Ocampo CB, Wesson DM. Population dynamics of *Aedes aegypti* from a  
479 dengue hyperendemic urban setting in Colombia. Am J Trop Med Hyg.  
480 2004;71(4):506–13.
- 481 68. Koou SY, Chong CS, Vythilingam I, Lee CY, Ng LC. Insecticide resistance  
482 and its underlying mechanisms in field populations of *Aedes aegypti* adults  
483 (Diptera: Culicidae) in Singapore. Parasites and Vectors. 2014;7(1):1–15.
- 484 69. Zhu F, Lavine L, O’Neal S, Lavine M, Foss C, Walsh D. Insecticide resistance  
485 and management strategies in urban ecosystems. Insects. 2016;7(1):1–26.
- 486 70. Monteiro FA, Shama R, Martins AJ, Gloria-Soria A, Brown JE, Powell JR.  
487 Genetic Diversity of Brazilian *Aedes aegypti*: Patterns following an  
488 Eradication Program. PLoS Negl Trop Dis. 2014;8(9):1–10.

489 **Supporting information**

490 **S1.** Nucleotide diversity of the COI gene for *A. vexans* populations. Mafft alignment to  
491 compare the haplotypes from this study. The amino acid sequence translated is represented by  
492 capital letters in blue, over the first nucleotide of its corresponding codon. Invariable sites are  
493 indicated with points, contrary to the alternative nucleotide, and spaces with (-).

494



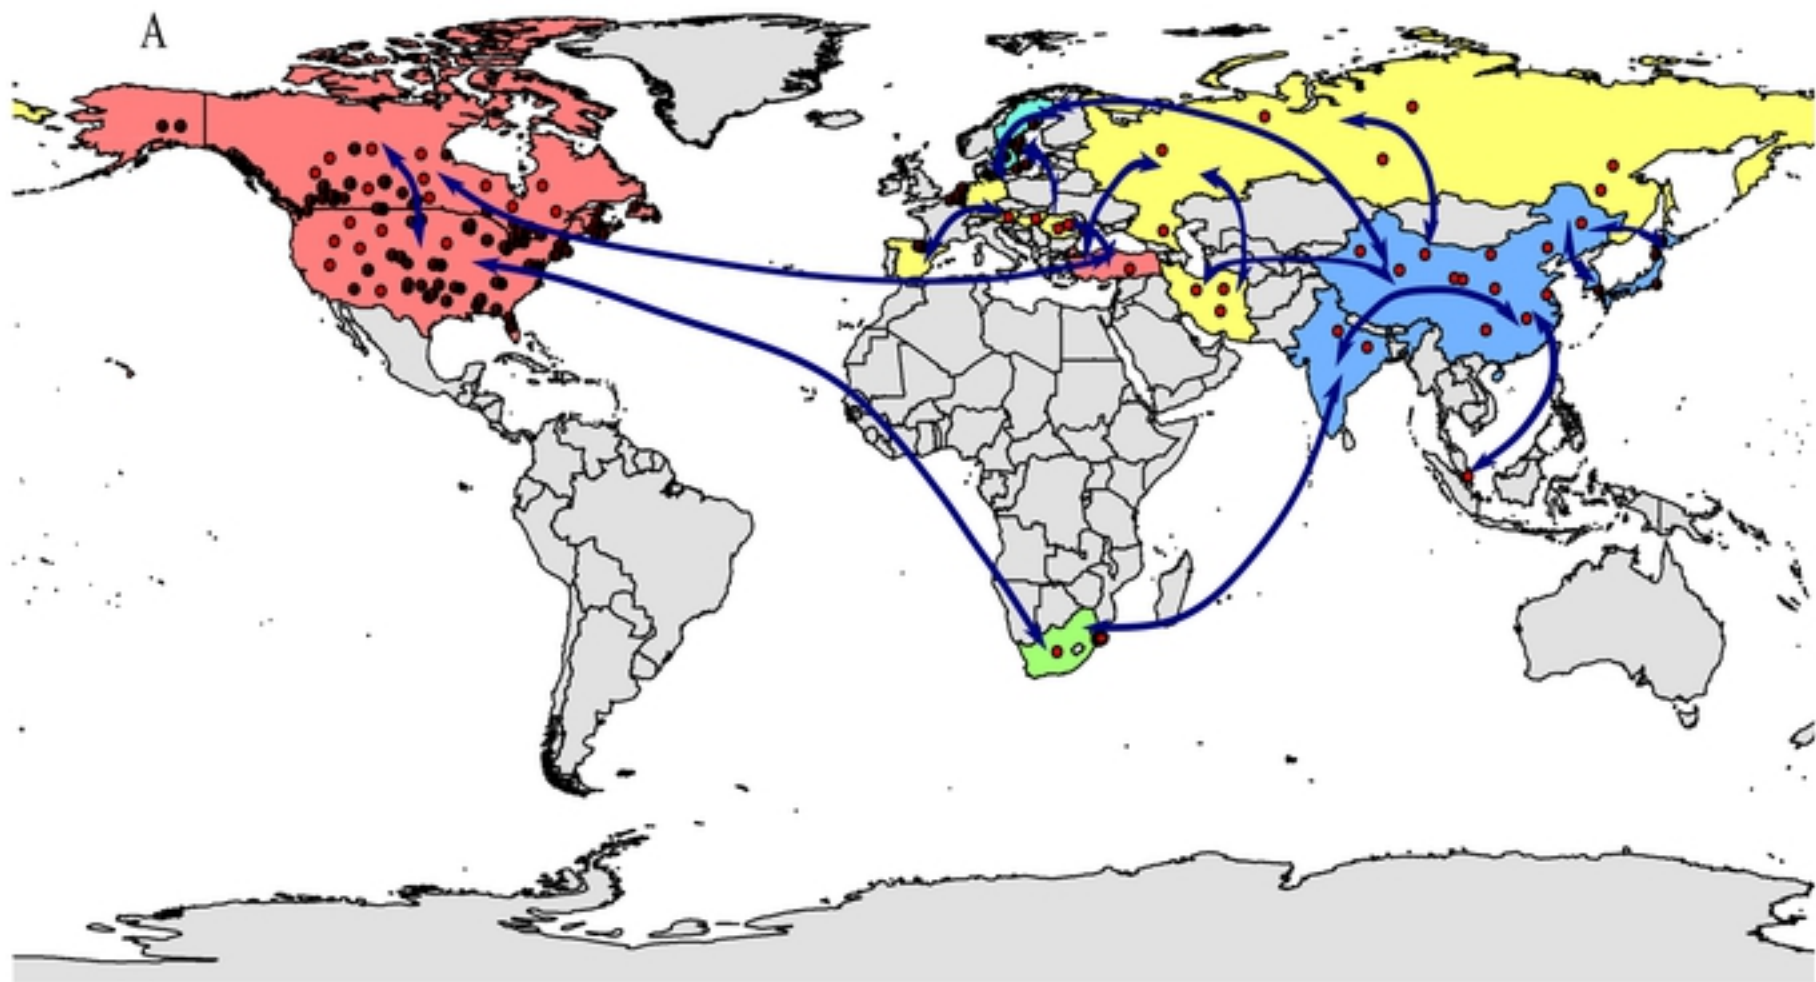

bioRxiv preprint doi: <https://doi.org/10.1101/2021.04.15.439950>; this version posted April 15, 2021. The copyright holder for this preprint (which was not certified by peer review) is the author/funder, who has granted bioRxiv a license to display the preprint in perpetuity. It is made available under aCC-BY 4.0 International license.

B

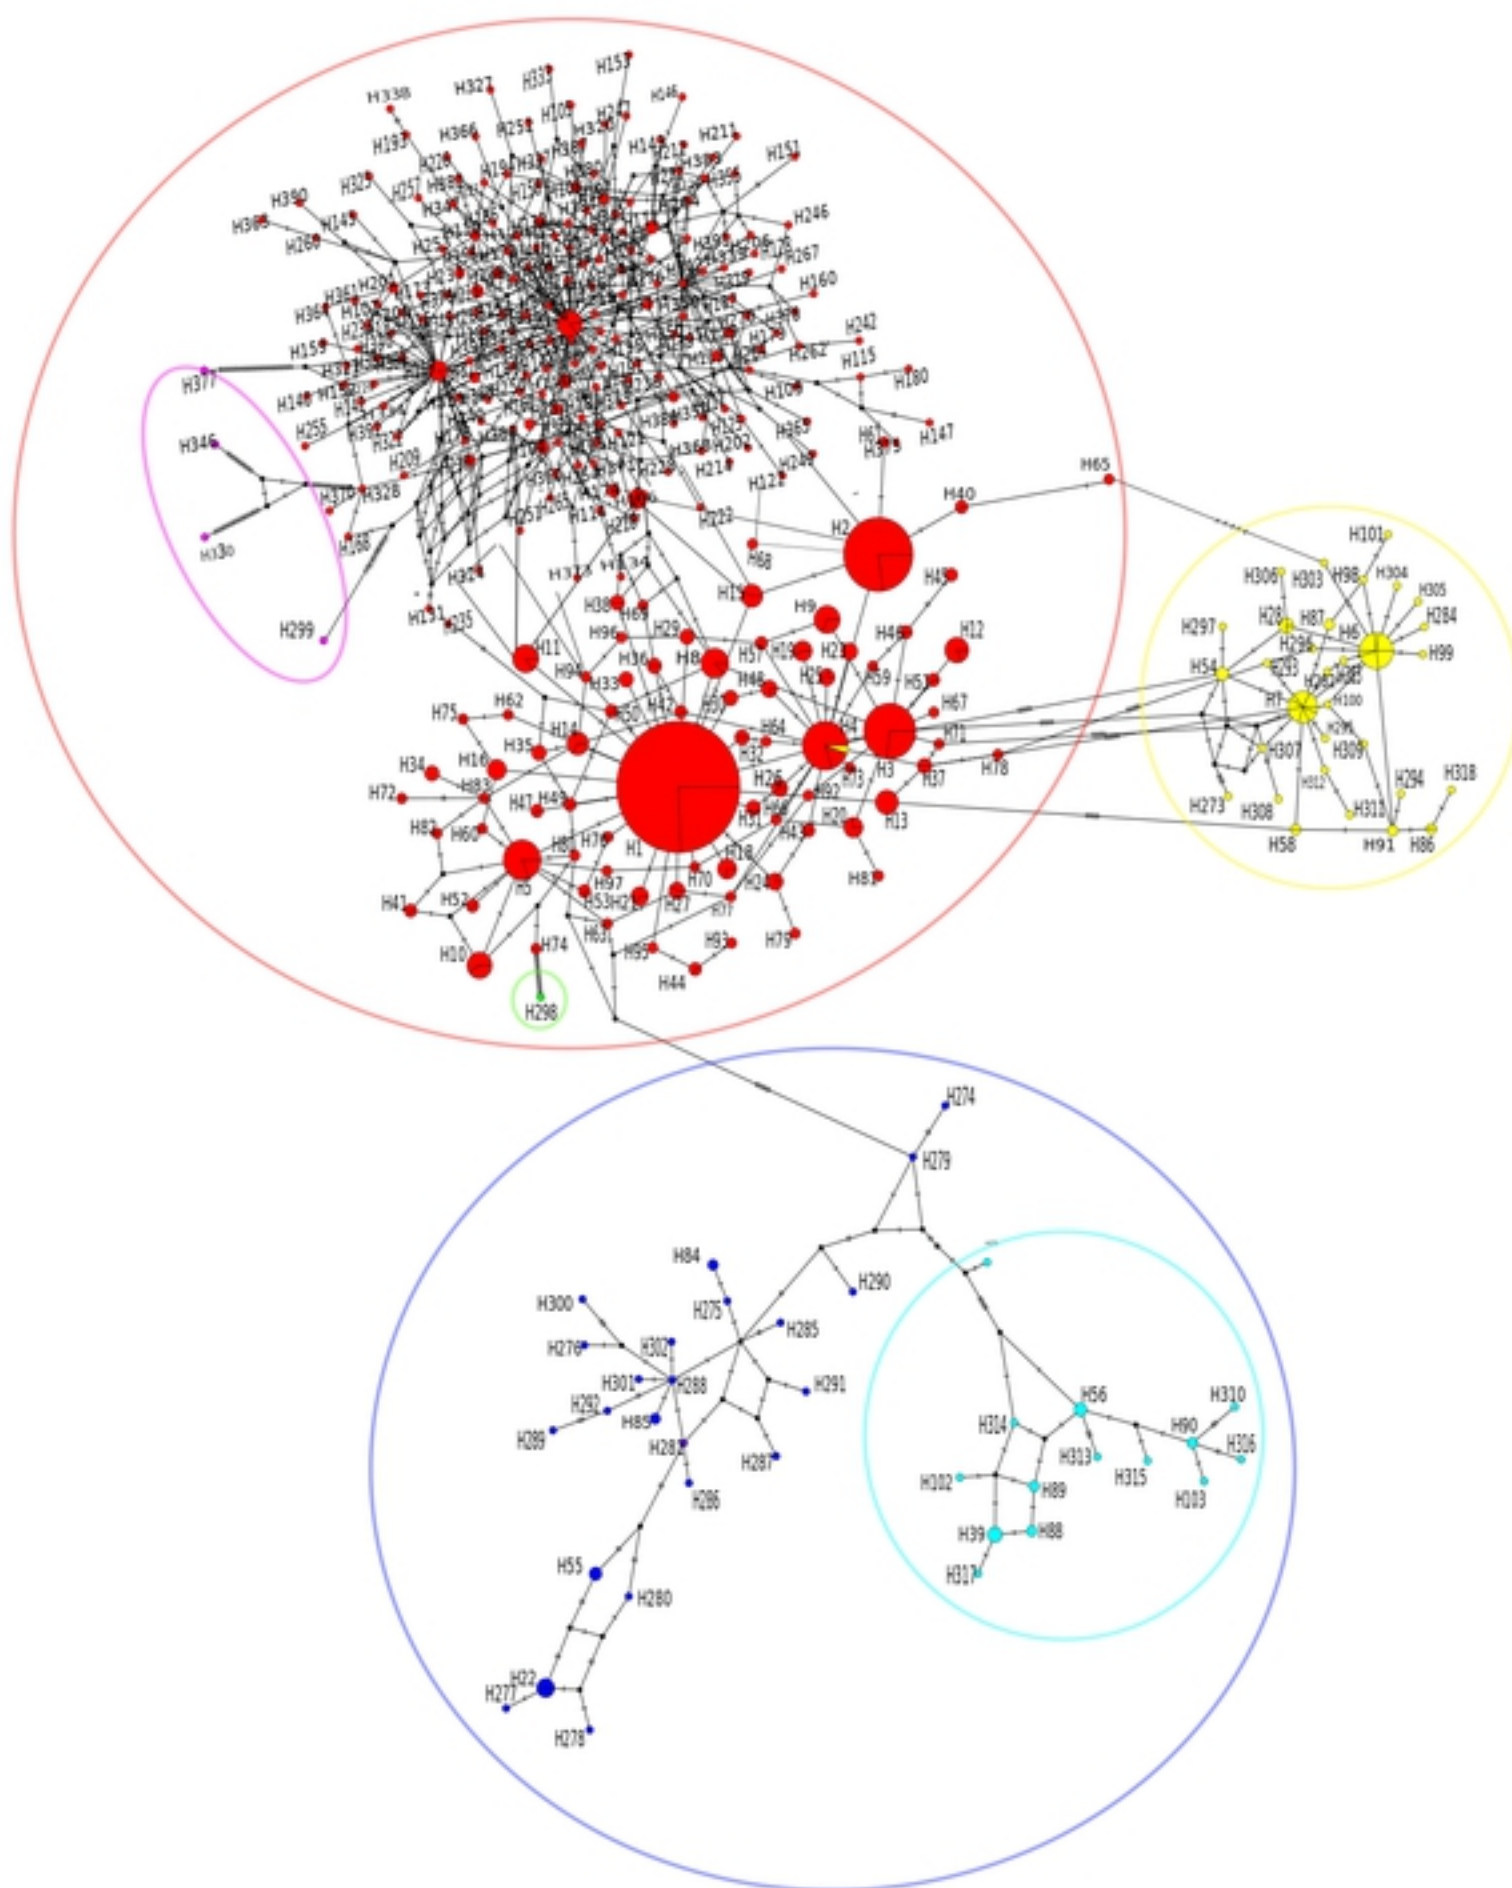

Figure 1

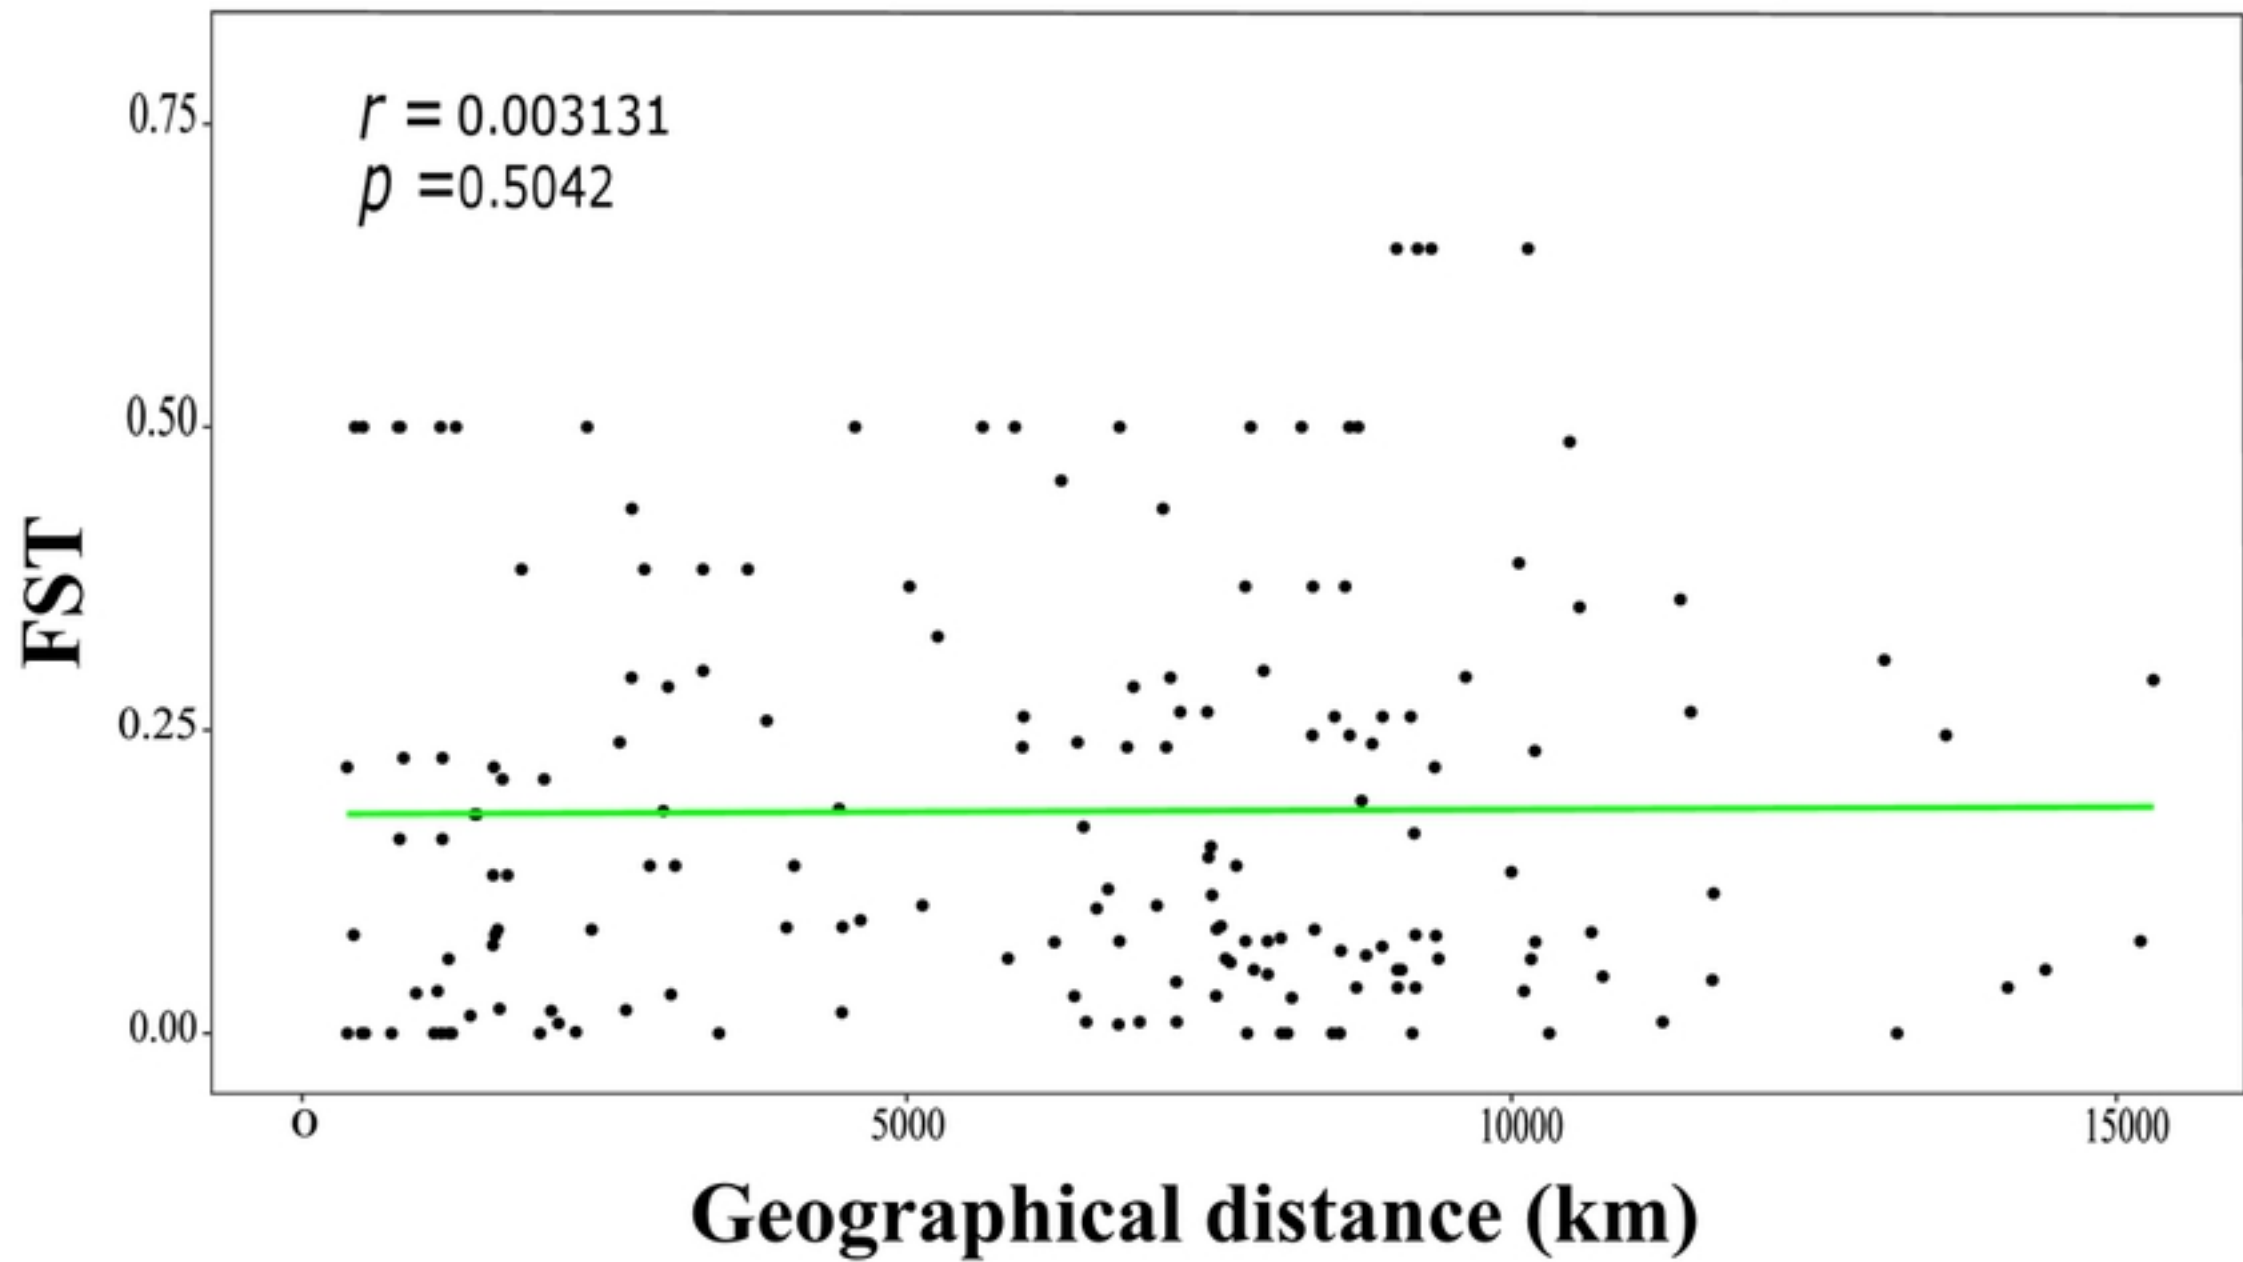

Figure 2

bioRxiv preprint doi: <https://doi.org/10.1101/2021.04.15.439950>; this version posted April 15, 2021. The copyright holder for this preprint (which was not certified by peer review) is the author/funder, who has granted bioRxiv a license to display the preprint in perpetuity. It is made available under aCC-BY 4.0 International license.

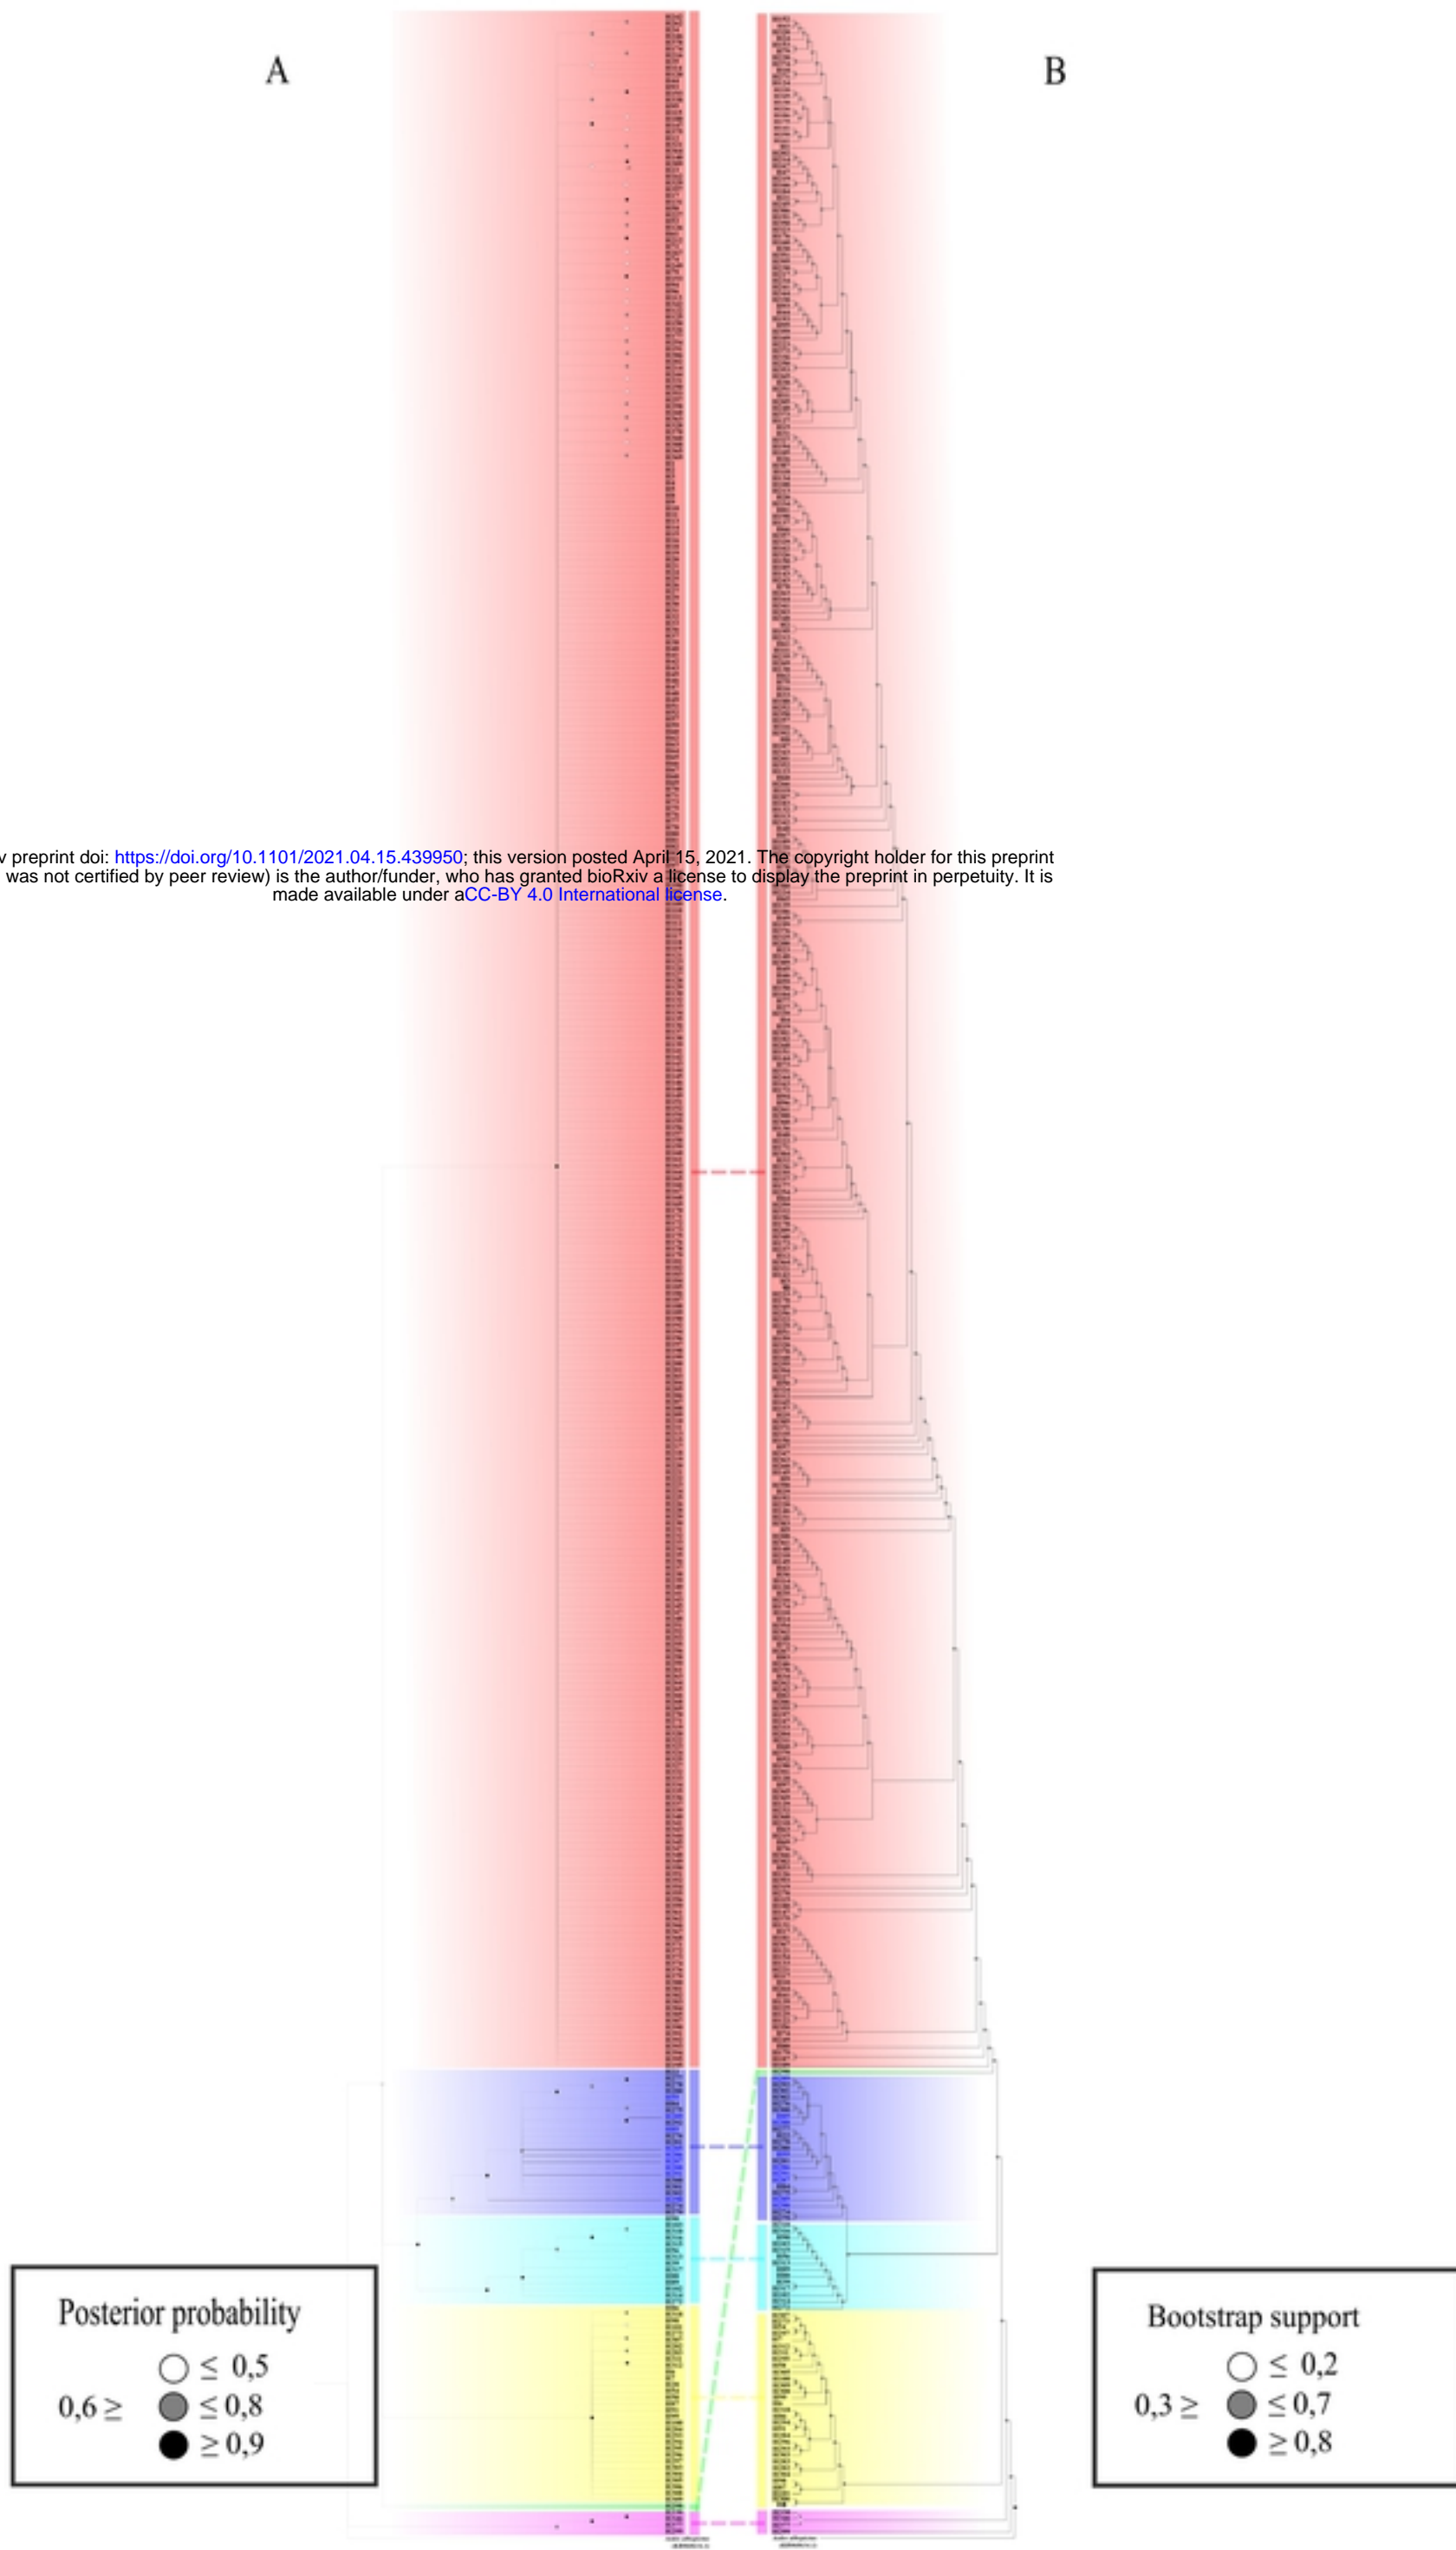

Figure 3
